## Title

The *Maize LINC KASH AtSINE-like2 (MLKS2)* gene encodes an ARM domain protein that tethers the nucleus to F-actin and is required for normal development and meiotic chromosome segregation

## Authors

Gumber, Hardeep K.<sup>1</sup>; McKenna, Joseph F.<sup>2</sup>; Tolmie, Andrea F.<sup>2</sup>; Jalovec, Alexis M.<sup>1</sup>; Kartick, Andre C.<sup>1</sup>; Graumann, Katja<sup>2</sup>; Bass, Hank W.<sup>1</sup>

## Affiliations

1. Department of Biological Science, Florida State University, Tallahassee, FL, USA, 32306-4295.

2. Department of Biological and Medical Sciences, Faculty of Health and Life Sciences, Oxford Brookes University, Oxford, UK, OX30BP.

Corresponding Author:

Hank W. Bass, [bass@bio.fsu.edu](mailto:bass@bio.fsu.edu)

**Abstract:** The linker of nucleoskeleton to cytoskeleton (LINC) complex is an essential multi-protein structure spanning the eukaryotic nuclear envelope. The LINC complex functions to maintain nuclear architecture, positioning, and mobility, along with specialized functions in meiotic prophase and chromosome segregation. Members of the LINC complex were recently identified in maize, an important scientific and agricultural grass species. Here we characterized *Maize LINC KASH AtSINE-like2*, *MLKS2*, which encodes a highly conserved SINE-group plant KASH protein with characteristic N-terminal armadillo repeats (ARM). Using a heterologous expression system, we showed that actively expressed GFP-*MLKS2* is targeted to the nuclear periphery and colocalizes with F-actin and the endoplasmic reticulum, but not microtubules in the cell cortex. Expression of GFP-*MLKS2*, but not GFP-*MLKS2* $\Delta$ ARM, resulted in nuclear anchoring. Functional conservation of *MLKS2* was demonstrated through genetic rescue of the misshapen nuclear phenotype of an Arabidopsis (triple-WIP) KASH mutant. Genetic analysis of transposon-insertion mutations, *mlks2-1* and *mlks2-2*, showed that the *MLKS2* is a pleiotropic gene affecting root hair nuclear morphology, stomatal complex development, multiple aspects of meiosis, and pollen viability. In male meiosis, the mutants showed defects for bouquet-stage telomere clustering, nuclear repositioning, perinuclear actin accumulation, dispersal of late prophase bivalents, and meiotic chromosome segregation. These findings support a model in which the nucleus is connected to cytoskeletal F-actin through the ARM-domain alpha solenoid structure of *MLKS2* protruding from the nuclear envelope. This study establishes a role for the SINE-type KASH proteins in affecting the dynamic nuclear phenomena required for normal plant growth and fertility.

### Keywords

KASH, LINC, Nuclear envelope, Actin, FRAP, maize, *MLKS2*, meiosis, telomeres, bouquet

### List of abbreviations

FRAP; Fluorescence recovery after photobleaching

DPI; Days post infiltration

OD; Optical density

*MLKS2*; *Maize LINC KASH AtSINE-like2*

LINC; Linker of nucleoskeleton to cytoskeleton

NE; Nuclear envelope

INM; Inner nuclear membrane

ONM; Outer nuclear membrane

## INTRODUCTION

The cell nucleus is a eukaryotic organelle that houses, organizes and expresses the bi-parentally inherited genetic material. As a cellular compartment, the nucleus is separated from the cytoplasm by the multifunctional double-membraned nuclear envelope (NE). The NE has embedded macromolecular protein complexes, such as the nuclear pore complex (NPC) and the linker of nucleoskeleton to cytoskeleton (LINC), which function to coordinate fundamental cell processes such as signalling and gene regulation (reviewed by D'Angelo, 2018; Hetzer, 2010; Van de Vosse et al., 2011).

The LINC complex was discovered relatively recently, but has been shown to be highly conserved in eukaryotes, with myriad functions as described in numerous reviews (Burke and Roux, 2009; Chang et al., 2015; Hieda, 2017; Kim et al., 2015; Luxton and Starr, 2014; Meier et al., 2017). These LINC-mediated functions include regulation of nuclear shape and position (Dittmer and Richards, 2008; Sakamoto and Takagi, 2013), mechanosensory signal transduction (Uzer et al., 2016), control of cell division, intranuclear architecture and gene regulation (Alam et al., 2016; Poulet et al., 2017b; Wang et al., 2018), and the specialized behavior of meiotic chromosomes to ensure segregation and fertility (Link et al., 2014; Murphy et al., 2014; Varas et al., 2015). The two core LINC components are the inner nuclear membrane (INM) SUN-domain proteins (Hagan and Yanagida, 1995; Malone et al., 1999) and outer nuclear membrane (ONM) KASH-domain proteins (Starr and Han, 2002). The SUN domain proteins are relatively well conserved across taxa and can be recognized by sequence homology and domain composition which includes transmembrane domains, the SUN domain, and a coiled-coil domain. In contrast KASH proteins are functionally conserved with a C-terminal region that includes a transmembrane domain and diagnostic terminal residues, but otherwise can be quite divergent with limited apparent homology (Evans et al., 2014; Kim et al., 2015; Meier, 2016; Poulet et al., 2017a; Zhou and Meier, 2013).

Structural studies reveal that SUN proteins form trimers that can bind to three KASH proteins (Sosa et al., 2012). The cytoplasmic N-terminal region of KASH domain proteins interacts directly or indirectly with a variety of cytoskeletal structures including motor proteins, microfilaments, microtubules or intermediate filaments (Luxton and Starr, 2014; Starr and Fridolfsson, 2010; Tamura et al., 2013; Varas et al., 2015). The forces generated by the cytoskeletal elements result in LINC-dependent movements and specialized morphology of the nucleus as required for cell division, fertilization, and development, as well as response to pathogens and symbiotic interactions (Griffis et al., 2014; Groves et al., 2018; Gundersen and Worman, 2013; Starr and Fridolfsson, 2010).

Most of our knowledge of the LINC complex comes from studies of metazoans and yeast. However, given the global challenges in agriculture and the need for plant-

based biorenewable resources (Godfray et al., 2010), it is important to better understand the plant nuclear envelope and its fundamental components. Recently, progress towards understanding plant LINC biology has expanded beyond Arabidopsis to include medicago, and maize (Gumber et al., 2019; Newman-Griffis et al., 2019).

The first plant SUN domain protein was OsSad1, found in a nuclear proteomic study in rice (Moriguchi et al., 2005). Subsequently, SUN domain proteins have been identified in many plant species (reviewed by Meier, 2016; Meier et al., 2017; Poulet et al., 2017a) with roles in the maintenance of nuclear shape and size (Graumann et al., 2010; Graumann et al., 2014; Oda and Fukuda, 2011) and meiotic chromosome behavior (Murphy et al., 2014; Varas et al., 2015). In maize, SUN2 has been shown to form a novel structure called the meiotic SUN belt during prophase of meiosis I (Murphy et al., 2014). The SUN belt region of the NE includes the telomere cluster which defines the zygotene bouquet (Murphy et al., 2014). The first plant KASH proteins were originally discovered through analysis of RanGAP-NE anchoring proteins and implicated in NE-associated signaling and maintenance of nuclear shape (Xu et al., 2007; Zhou et al., 2012). They were later shown to bind to SUN (Meier et al., 2010; Zhou et al., 2012) and possess a single near C-terminal TMD and a C-terminal amino acid sequence of V/P-P-T. These features are diagnostic of plant KASH-like proteins and were collectively used as criteria for identification of ten maize KASH candidates in maize (Gumber et al., 2019). From that study, four groups of Maize LINC KASH (MLK) related genes were identified: the *AtWIP*-like group (*MLKP1* - *MLKP4*), the *AtSINE*-like group (*MLKS1* and *MLKS2*), the grass-specific group (*MLKG1* and *MLKG2*), and the KASH-associated *AtWIT*-like group (*MLKT1* and *MLKT2*).

A particularly interesting and distinct group of plant KASH-like proteins are the SUN-interacting nuclear envelope (SINE) which contain armadillo domains (Armadillo-type fold, InterPro ID: IPR000225). The armadillo (ARM) type fold is a protein-protein interaction surface formed by twisting of multiple alpha helices around a central axis and has been reported in a variety of proteins involved in intracellular signalling and cytoskeletal regulation (Coates, 2003; Hatzfeld, 1998). Genetic analysis of SINE genes in Arabidopsis reveals non-redundant functions ranging from actin-dependent nuclear positioning in guard cells for *AtSINE1* to innate immunity against a fungal pathogen for *AtSINE2* (Zhou et al., 2014). Despite their deep conservation, the biological functions of plant SINE genes in monocot grass species remain largely uncharacterized. Maize contains two *AtSINE1* homologs, *MLKS1* (Zm00001d031134) and *MLKS2* (Zm00001d052955). Both of these contain ARM domain towards their N-terminus (Gumber et al., 2019). Given the fundamental importance of connecting the nucleus to the cytoplasm, these maize SINE-group KASH genes were predicted to participate in a broad array of processes requiring coordinated actions of the NE with the cytoskeleton.

In this study, we have undertaken an investigation of a single maize LINC gene, *MLKS2* for several reasons. First of all, *MLKS2* protein was detected in ColP assays using ZmSUN2 antisera with earshoot nuclei (Gumber et al., 2019). Secondly, *MLKS2* is expressed in actively dividing cells, including meiosis-stage tassels according to transcriptomic studies (Stelpflug et al., 2016). Thirdly, *MLKS2* orthologs are conserved across land plants, increasing the potential translational impact of the study (Gumber et al., 2019). Finally, two independent Mu transposon insertion alleles of *MLKS2* were available (<https://maizegdb.org/uniformmu>) allowing for genetic and phenotypic analyses. Here we characterize *MLKS2* using genetic and cellular experiments in order to: (1) test for canonical KASH properties of NE localization and SUN-binding; (2) investigate colocalization with cytoplasmic structures; (3) address its biological role in meiosis and nuclear shape & positioning via mutant phenotyping; (4) gain mechanistic insight into its role in nuclear positioning and actin interaction using domain deletion assays; and (5) test for functional conservation through cross-species genetic rescue of nuclear shape phenotype.

## RESULTS

The structure of *MLKS2* gene and protein are summarized in Figure 1. The *MLKS2* gene Zm00001d052955\_T001 (from B73 v4) has three exons and is predicted to encode a protein with 637 amino acids (Fig. 1A-B). The secondary and domain structure of the *MLKS2* protein includes the canonical KASH features of a single transmembrane domain near the C-terminus, followed by a 13 residue C-terminal KASH domain, and terminal sequence of LVPT (Fig. 1C). Nearly half of the protein (8-294) has an armadillo-type fold domain (InterPro IPR016024). Another large segment (301-598) is comprised of three segments classified as disordered regions designated here as DR1 (301-401), DR2 (414-478), and DR3 (488-598). Tertiary structure prediction using I-TASSER revealed that the ARM and disordered regions could adopt a single large structure similar to that of human protein phosphatase 2A, PP2A, a structural, scaffolding subunit. PP2A (pdb 1b3uA) was the top ranked structural analog as shown separately and threaded together (Fig. 1D). This overall structure is referred to as an alpha solenoid, broadly deployed in biological systems as binding structures (Fournier et al., 2013).

### **Nuclear envelope localization of *MLKS2* is disrupted by C-terminal but not ARM domain deletions**

Given the conservation of *MLKS2* to known KASH proteins, we first examined its cellular localization and potential to interact with SUN or cytoskeleton. GFP-tagged *MLKS2* was transiently expressed and imaged as shown in Figure 2 using the tobacco

expression system previously described (Gumber et al., 2019). The GFP-MLKS2 localized to the nuclear periphery as expected for a KASH protein (Fig. 2B). The GFP-MLKS2 was also seen at the cell periphery in a conspicuous pattern resembling that of a cytoskeletal network (Fig. 2B). In order to map the protein regions responsible for these patterns, we made a series of domain deletion constructs (Fig. 2A). The deletions were MLKS2 $\Delta$ 4, with removal of the terminal four amino acid residues; MLKS2 $\Delta$ KASH, with replacement of the terminal KASH domain with three alanine residues; MLKS2 $\Delta$ TM, with removal of the transmembrane domain; or MLKS2 $\Delta$ ARM, with removal of the entire Armadillo fold region, DR1, DR2, and part of DR3.

We found that the terminal  $\Delta$ 4 and  $\Delta$ KASH constructs reduced the relative abundance of MLKS2 at the nuclear periphery but retained the network-like pattern in cytoplasm as clearly seen at the cell periphery (arrows, Fig. 2B). In contrast, removal of the TM domain completely changed the localization pattern at both the nuclear and the cell periphery to one resembling that of a soluble protein showing nucleoplasmic and cytoplasmic labelling. The N-terminal deletion construct,  $\Delta$ ARM, retained its NE localization but with a more uniform and less patchy signal. However, the  $\Delta$ ARM variant had a dramatic effect on the cell peripheral labelling, which changed from a filamentous cytoskeleton-like pattern to a more endoplasmic reticulum-like patterns (arrow heads, Fig. 2B), including both sheets and tubules. These results demonstrate that when expressed under the control of constitutive promoter, MLKS2 can localize to two different cell compartments, the NE requiring C-terminal domains and the cytoplasm requiring the N-terminal ARM domains. It remains a formal possibility that the non-nuclear cytoplasmic MLKS2 may be an artifact of experimental over or heterologous expression and may not, therefore, reflect its primary biological function.

### **The KASH and ARM domains immobilize the NE-associated MLKS2**

We next tested for interaction of MLKS2 with ZmSUN2 using fluorescence recovery after photobleaching (FRAP). The mobility of GFP-MLKS2 expressed alone was compared to that co-expressed with full length mCherry-ZmSUN2 or deletion constructs lacking the SUN domain or coiled-coil regions of ZmSUN2 (Fig. 2C, D, S1). GFP-MLKS2 has a large immobile fraction to start with, showing only 25% fluorescence recovery 30 s after photobleaching (Fig. 2D). When co-expressed with full length SUN2, the immobile fraction of GFP-MLKS2 showed a slight but statistically insignificant increase compared to GFP-MLKS2 alone (Fig. 2C, D). When co-expressed with SUN2 protein lacking the coiled-coil domain (SUN2 $\Delta$ CC), the immobile fraction of GFP-MLKS2 was significantly increased compared to GFP-MLKS2 alone or when co-expressed with full length ZmSUN2. When co-expressed with ZmSUN2 protein lacking the SUN domain (SUN2 $\Delta$ SUN), the immobile fraction of GFP-MLKS2 was significantly and

markedly decreased compared to GFP-MLKS2 alone or when co-expressed with full length ZmSUN2.

Given the large immobile fraction of MLKS2 to begin with, we did not expect to observe a marked increase in its immobile fraction when co-expressed with full length SUN. However, the drastic reduction in the immobile fraction when co-expressed with  $\Delta$ SUN, compared to co-expression with full-length SUN, was unexpected but consistent with the interpretation that MLKS2 interacts with SUN2 via its SUN domain. We conclude that two regions of MLKS2 each play a role in anchoring it within the NE, the C-terminal KASH domain and the N-terminal ARM domain.

We used the FRAP mobility assay to decipher the contributions of the KASH and ARM domains to the relatively large immobile fraction of MLKS2. Removal of the KASH domain decreased the immobile fraction (Fig. 2E, F, S1), consistent with a KASH-SUN binding interaction in the nuclear envelope. Remarkably, removal of the ARM domain decreased the immobile fraction even more (Fig. 2E, F) making over 60% of the protein population mobile. This indicates that SINE2-type KASH proteins are likely docked in the NE through interactions at both ends, one via SUN-KASH binding in the NE and one via ARM domain binding to the cytoskeleton.

### **Genetic analysis of two transposon-disrupted alleles of *MLKS2***

For genetic analysis, we searched the UniformMu transposon mutagenesis records (McCarty and Meeley, 2009) at maizeGDB and found two alleles for *MLKS2*. The mutator element mobilized in UniformMu is MuDR, a 1.4 kbp non-autonomous *Mu1* element (Barker et al., 1984). The two insertion alleles are designated here as *mlks2-1* and *mlks2-2*, as diagrammed in Figure 3. Both alleles involved insertions into the protein coding region in exon 2. PCR primers were selected to confirm the location and sequences surrounding the transposon insertion sites (Fig. 3 A,B). For each allele, a 9-bp target site duplication was detected (underlined, Fig. 3B), characteristic for *Mu* insertions. The PCR reactions used for genotyping of individual plants are shown for representative individuals from families segregating for the insertions (Fig. 3C)

We examined RNA from immature, meiosis-staged tassels of wild-type and mutant plants to check if the transposon insertions reduced the mRNA levels. Quantitative RT-PCR showed that both alleles, *mlks2-1* and *mlks2-2*, resulted in decreased relative RNA levels when compared to those from wild-type siblings (*Mu -/-*) of *mlks2-1* and *mlks2-2* or those from parental W22 line of maize (Fig. 3D). Of the two alleles, *mlks2-2* showed the most reduction in transcript levels.

### ***MLKS2* is required for normal meiosis and pollen development.**

Given the role of the LINC complex and nuclear envelope in meiosis, we asked whether genetic disruption of *MLKS2* resulted in meiotic or post-meiotic phenotypes. In

maize, like most eukaryotes, the nuclear envelope and the LINC complex has highly specialized functions including a role in telomere bouquet formation, pairing, synapsis, and recombination, all of which must occur with high fidelity to ensure proper genome reduction and euploid transmission. We used 3D cytology to look therefore, for several hallmarks of normal male meiosis including the telomere bouquet, the eccentric positioning of the nucleus at early prophase, 10 bivalents at late prophase indicative of complete pairing and recombination, and equal distribution of chromosomes after meiosis I and II as evidenced by daughter nuclei with matching sizes and shapes.

The *mlks2-2* mutants showed deviations from all of the cytological meiotic hallmarks inspected as summarized in Figure 4. At early meiotic prophase, 3D telomere FISH revealed that the *mlks2-2* plants showed partial telomere clustering on the NE at the bouquet stage (Fig. 4A-C) with variable numbers (4-12) of telomere FISH signals far removed from the primary cluster (bracketed "bq" in Fig. 4A, B). The magnitude of telomere dispersion was measured using pairwise telomere FISH signal distances per nucleus. The average pairwise telomere distance increased by 50% in the mutant, from 4.3 micron in normal nuclei (n=6) to 6.5 micron in *mlks2-2* nuclei (n=11). The tendency for multiple telomeres to reside far from the bouquet is also seen in the fold change of inter-telomere pairwise distances for the long distance bins (Fig. 4C). At early prophase, meiotic nuclei tend to relocate towards one edge of the cell (Cowan et al., 2002), but *mlks2-2* nuclei remained closer to the cell center (Fig. 4D,E), according to measures of nuclear eccentricity. The cell-to-nucleus centroid offset at early prophase in normal cells decreased from 15 microns in normal (n=6) plants to 7 microns in mutant (n=11) plants (Fig. 4F).

In the late prophase stages of diplotene or diakinesis, chromosomes continue to condense while successful disomic pairing and recombination becomes cytologically evident in the form of well separated bivalents. These bivalents total up to the haploid chromosome number, 10 in the case of normal maize (Fig. 4G). Failure to properly pair or recombine typically results univalents or polyvalents, which in turn are unable to make subsequent bipolar alignment at metaphase and separation at anaphase during meiosis I division. The *mlks2-2* mutation caused conspicuous and obvious departure from these normal late prophase patterns (Fig. 4H-J). The meiotic chromosomes from mutant plants showed aggregation and pronounced clumping of multiple chromosomes with relatively few clear examples of well separated bivalents (compare Fig. 4G to 4H-I). The tendency and degree of aggregation varied in the mutant plant, even for cells from the same anther. The majority, but not all mutant cells showed these late prophase phenotypes. This late prophase clumping phenotype is intriguing given that telomere-NE tethering normally persists even after the bouquet stage. These results place MLKS2 in the poorly understood pathway that ensures uniform dispersal of bivalents after pachytene.



Anaphase and telophase can be particularly informative stages for detection of abnormal chromosome segregation. We found that the *mlks2-2* mutants showed numerous such segregation defects, including chromosomes not in the metaphase plate bundle (arrows, Fig 4L-N). The mutant plants frequently showed chromosome laggards (Fig. 4P-Q) and micronuclei (Fig. 4R), both of which are indicative of missegregation. Frequency of cells with one or more aberrant patterns at meiosis I (metaphase, anaphase, telophase) were low for wild-type (5%, n = 200) but high for *mlks2-2* (46%, n = 303).

We next checked for post-meiotic phenotypes associated with pollen viability. Acid fuchsin and malachite green differential pollen staining revealed that both *mlks2-1* and *mlks2-2* plants showed reduced pollen viability compared to normal plants (Fig. 4S-V, n>1,000 for each genotype). The pollen sterility phenotype was only partially penetrant and like the other phenotypes, more severe for *mlks2-2*. Taken together, these phenotypes show that MLKS2 is required for proper male reproduction, with cytological phenotypes appearing as early as the zygotene stage of meiosis.

### **MLKS2 plays conserved role in nuclear shape maintenance in root hair cells**

Root hair nuclei in plants are pleomorphic and in Arabidopsis their shape and positioning are disrupted by mutations in nearly every member of the LINC or LINC-associated group of genes (Dittmer and Richards, 2008; Oda and Fukuda, 2011; Tamura et al., 2013; Zhou et al., 2012). Interestingly, this rounding up or loss of elongation nuclear shape phenotype appears to be generally diagnostic for genetic disruption of the LINC complex. We measured nuclei lengths in maize root hairs 5 days after imbibition, from normal and *mlks2* mutants. Normal (W22+) nuclei averaged a length of 37 micron, but mutant nuclei were only half that long on average (Fig. 5A, B). A related measure, circularity index from edge-traced nuclei in 2D images, also changed from 0.4 in normal plants to a more circular value of 0.7 in the more "rounded up" mutants (Fig. 5C). Although the biological role of root hair nuclear elongation remains to be determined, these shape measures provide a quick and quantitative phenotypic readout for genetic disruption of the LINC complex at the seedling stage.

### **MLKS2 is required for normal stomatal complex development**

While screening seedling leaf tissues for nuclear shape phenotypes, we found an unexpected and dramatic effect of *mlks2* mutants on stomatal complex development as summarized in Figure 6. Normal stomatal development in maize leaves (reviewed by Smith, 2001) results in a bilaterally symmetric 4-cell complex composed of 2 dumbbell-shaped guard cells (GC in Fig. 6A) flanked by two subsidiary cells (SC in Fig. 6A). In the *mlks2* mutants, the subsidiary cells, but not the guard cells, exhibited dramatic and variable deviations (denoted by arrows, Fig. 6D-I) in size, shape, and number per

stomatal complex. Given the known role of asymmetric cell division in the normal development of the guard cell complex, we checked for cell polarity phenotypes at earlier stages of development. Images from the meristematic base of the fourth leaf showed that the *mlks2-2* mutant exhibited irregular cell polarities and division planes (Fig. 6L), abnormal shaped subsidiary cells (Fig. 6O), or extra inter-stomatal and subsidiary mother cells (Fig. 6K, N). These phenotypes closely resemble those of the *pangloss* or *brick* mutants of maize, known to perturb nuclear positioning and the actin cytoskeleton culminating in irregular subsidiary cell development. These findings uncover an unanticipated developmental role for the *MLKS2* that likely reflects its role in cell polarization and nuclear positioning for specialized, highly asymmetric cell divisions leading to the differentiation of the stomatal complex.

### **MLKS2 interacts with F-actin via its ARM domain and is required for recruitment of meiotic perinuclear actin**

Given that *MLKS2* has ARM domains, localizes to a cytoskeletal-like network, and shows mutant phenotypes suggestive of cytoskeletal interactions, we wanted to more directly explore the interaction of *MLKS2* with actin. First, GFP-*MLKS2* was co-expressed with markers for the endoplasmic reticulum (RFP-HDEL), the actin cytoskeleton (RFP-Lifeact) or the microtubule cytoskeleton (mCherry-TUA5) as shown in Figures 7, S2. Colocalization of GFP-*MLKS2* was seen for both ER and F-actin but not microtubule markers (Fig. 7A, S2). The actin, but not the ER colocalization with *MLKS2* requires the presence of the *MLKS2* ARM domain region (Fig. 7B). To further demonstrate that *MLKS2* interacts with F-actin we examined the localization of *MLKS2* in cells treated with Latrunculin-B (LatB) to depolymerize the F-actin. This treatment caused the GFP-*MLKS2* staining pattern to change from fibrous to a more ER-like network, similar to that of the ARM domain deletion of *MLKS2* (compare 2B to 7C). These findings show that when expressed in tobacco, *MLKS2* appears to induce an actin-ER colocalization. *MLKS2* appears to connect the ER to F-actin through its ARM domain. Consistent with this, the mobile fraction of *MLKS2* in the NE was increased after F-actin depletion by lat-B (Fig. 7D, E). This result provides additional evidence that *MLKS2* binds to F-actin in an ARM domain-dependent manner.

Given these results together with the previously established roles for some KASH proteins actin-based nuclear anchoring (Gundersen and Worman, 2013; Huelsmann and Brown, 2014; Zhou et al., 2014), we next asked if GFP-*MLKS2* could affect nuclear mobility in a live cell assay. The nuclear mobility baseline was first established in *N. benthamiana* using GFP-LBR (Graumann et al., 2010) as a general NE marker (Fig. 7F-H). For these experiments, nuclear movement was tracked in live cells for five min by imaging at 10 s intervals to obtain total distance migrated. Compared to the GFP-LBR expressing control, the nuclei expressing GFP-*MLKS2* were dramatically immobilized as

shown by temporal color coded projections, kymograph analysis (Fig. 7F-G) and measurements of total distance of nuclear movement over the 30-frame time-lapse (Fig. 7H). Expression of MLKS2 and MLKS2 $\Delta$ KASH resulted in significant decreases in nuclear movement compared to the LBR control. In contrast, the nuclear anchoring activity of MLKS2 could be abolished by deletion of the ARM domains (Fig. 7H). These live nuclear mobility assays define an ARM-dependent nuclear anchoring activity for MLKS2, consistent with the core function of the LINC complex in connecting the nucleus to the cytoskeleton.

Given the role of the NE dynamics in meiotic prophase and our findings that MLKS2 interacts with F-actin in somatic cells, we returned to maize to check genetic evidence of MLKS2-actin interactions in pollen mother cells at meiotic prophase (Fig. 7I-P). The overall appearance of phalloidin-stained F-actin in W22+ was similar to that of *mlks2-2* meiocytes, with two notable exceptions. First, the F-actin in the mutant plants appeared to exhibit a subtle phenotype described as somewhat discontinuous F-actin structures (compare fiber lengths of Fig. 7 panels J and L versus N and P). Secondly, and most importantly, we observed that the *mlks2-2* meiocytes exhibited a conspicuous loss of perinuclear F-actin staining. Perinuclear actin is common in maize meiocytes (Murphy et al., 2014) and intensity line profile tracings show clear evidence of F-actin concentration spikes around the nucleus (yellow arrows, Fig. 7JL). However, we were unable to observe, by inspection (Fig. 7I-L) or line profile analysis (Fig. 7M-P), any such perinuclear actin staining in *mlks2-2* mutant meiocytes. These maize cytological findings have major mechanistic implications for understanding the role of *mlks2-2* mutation in the abnormal meiosis phenotypes (Fig. 4).

### **MLKS2 can rescue Arabidopsis triple wip nuclear shape phenotype**

Finally, the functional conservation of MLKS2 in plants was addressed using a genetic rescue assay. Previously, it has been shown that deletion of certain KASH proteins, such as AtWIPs, causes nuclei to become more circular (Zhou et al., 2012). GFP-MLKS2 was expressed in Arabidopsis harboring mutations in three WIP genes to determine if the maize SINE-group KASH protein could correct the nuclear shape defect phenotype. For this experiment, stable transformants expressing GFP-MLKS2 were grown and nuclei were imaged and analyzed from two different tissues as shown in Figure 5D-G. Circularity index measurements of leaf and root nuclei showed that maize GFP-MLKS2 complemented the nuclear shape phenotype of the triple-WIP mutant in Arabidopsis by restoring the nuclei to wild-type length in two different cell types. These experiments demonstrate that a GFP-tagged maize SINE-family KASH protein can substitute for Arabidopsis WIP-family KASH proteins in nuclear shape control.

In conclusion, Figure 8 shows a working model for the maize LINC SINE-group KASH domain protein, MLKS2. Through this model, we propose that MLKS2 directly

interacts in wild-type (Fig. 8A), but not mutant plants (Fig. 8B) with F-actin via its N-terminal ARM domains. This interaction between MLKS2 and F-actin could be achieved by direct or indirect contact (Fig. 8B, compare left and right). This model explains how MLKS2 could bind and recruit perinuclear F-actin to accomplish several biological functions including nuclear shape and positioning, division plane control, and meiotic chromosome segregation. In tobacco (Fig. 8C,D), expression of GFP-MLKS2 or GFP-MLKS2 $\Delta$ KASH result in nuclear anchorage according to kymograph analysis, suggesting the the ARM domain can anchor the nucleus even if the KASH domain is absent. The anchorage is relieved by removal of the ARM domains (Fig. 8D, right half). The models from heterologous expression in *N. benthamiana* include GFP-MLKS2 in the core LINC complex via a presumed interaction with tobacco SUN (NbSUN, grey) or a demonstrated interaction with maize SUN2 (red, ZmSUN2). Taken together, the findings reported here establish that the maize KASH protein MLKS2 plays a role in multiple biological pathways including stomatal complex development, meiotic nuclear architecture and positioning, meiotic chromosome segregation, and production of viable pollen.

## DISCUSSION

In this study we characterized a core LINC component, MLKS2, in maize using genetic and cellular assays. We showed that MLKS2 localizes to two cellular compartments, the nuclear envelope as expected and cytoplasmic ER where it colocalizes with actin via the ARM domain region. Genetic analysis uncovered mutant phenotypes in both vegetative and and reproductive organs while documenting the first case of a plant KASH required for proper telomere clustering and chromosome behavior in meiotic prophase. Interactions of MLKS2 with F-actin explain many of observations in maize and tobacco, and the ARM domains of MLKS2 appear to confer functional properties that may represent general mechanistic principles for control of nuclear shape and positioning. The pleiotropic nature of the mutants and its deep conservation in plants may be important for a variety of tissue-specific biological functions that require specialized control of nuclear morphology and dynamics. For instance, MLKS2 may play a role in female meiosis and ovule development where highly organized nuclear positioning occurs in the mature ovary, pollen development and nuclear migration of sperm and vegetative nuclei, and fertilization itself. Interestingly, the overall plant morphology of both the wild type and homozygous mutant plants was largely normal.

At the onset of this study, the diagnostic ARM domains of the SINE group of plant KASH and previous findings from Arabidopsis AtSINE1 (Zhou et al., 2014) pointed to a possible MLKS2 interaction with F-actin. Interestingly, GFP-AtSINE1 but not GFP-AtSINE2, colocalizes with F-actin when expressed in tobacco or Arabidopsis (Zhou et

al., 2014). Medicago SINE genes, *MtSINE1* and *MtSINE2*, also encode proteins that colocalize with F-actin (Newman-Griffis et al., 2019). The ARM domains alone may not, therefore, be predictive of F-actin binding. Consistent with this is the fact that a variety of proteins have ARM domains, but their binding partners vary (Coates, 2003). In this study, there exists a clear preponderance of evidence, direct and indirect, that MLKS2 has F-actin binding activities. In the heterologous expression system, MLKS2 localizes to the NE, as expected for a KASH domain protein, and to a cytoskeletal-like reticulate network that colocalizes with F-actin and ER markers at the cell periphery (Fig. 7A). Two complementary cell localization experiments, latrunculin-B depletion of F-actin and ARM domain deletions, uncover a possible cytoplasmic function that does not involve the nucleus, but rather deploys MLKS2 to tether the ER to cytoplasmic F-actin. In this regard, MLKS2 resembles members of the Networked (NET) proteins, as defined by Hussey and colleagues (Deeks et al., 2012). However, we note that the non-nuclear cytoplasmic MLKS2 may result from overexpression or compromised targeting in the heterologous expression system used. Although MLKS2 does appear to fit the definition of membrane-bound plant-specific actin-binding adapter protein, it lacks the tryptophan-rich NET actin-binding (NAB) domain sequence, common to NET families 1-4 (Hawkins et al., 2014). The NET NAB domain is thought to confer actin-binding activity, whereas for MLKS2 that activity may come from the ARM domain. If the cytoplasmic MLKS2 is primarily a result of overexpression, it nonetheless predicts that misregulation by overexpression may present cellular dysfunction phenotypes generally associated with the cytoplasm and specifically associated with the ER and cortical F-actin.

The actin-interaction with core LINC NE components provides mechanistic insights into several cellular functions of MLKS2 in both vegetative and reproductive parts of the maize plant. We focused on three major nuclear phenotypes assayed primarily in somatic cells; (1) positioning within the cell, (2) shape, and (3) mobility. Nuclear positioning was implicated by genetic analysis of stomatal complex development, nuclear shape was impacted in rescue of root hair nuclei rounding up, and nuclear mobility was directly measured in live cells.

Nuclear positioning defines cell polarity. One well characterized example of highly polarized cells associated with asymmetric cell divisions is the normal stomatal complex development in leaves. In wild-type maize, guard mother cells (GMC) signal to adjacent subsidiary mother cells (SMC) to commence a series of cellular events involving nuclear migrations and localized actin patches that coordinate the eventual production of a mature stomatal complex (Müller et al., 2009). The mature stomatal complex is characterized by two guard cells flanked by subsidiary cells, displaying a bilateral symmetry. Mutations known to disrupt stomatal complex development in maize fall into one of several gene families represented by the *discordia* (*dcd1*), the *pangloss*

(*pan1*, *pan2*), and the *brick* (*brk1*, *brk2*, and *brk3*) mutants (Facette et al., 2015). The brick proteins are part of the SCAR complex which interacts with ARP to form actin patches on the GMC side of the SMC. How the nucleus moves towards the actin patches is not known. The KASH phenotypes reported here bear a striking resemblance to those of *pan1* and *brk1*, placing *MLKS2* in the stomatal complex development pathway. Given that *MLKS2* ARM domains appear to interact with F-actin, it is tempting to speculate that the developmental defect seen in *mlks2* reflects a failure to coordinate nuclear positioning with the cortical-ER-patches known to occur at the region adjacent to the inducing GMC (Giannoutsou et al., 2011).

Nuclear shape maintenance is one of the fundamental functions performed by LINC complex proteins. Nuclear morphology is commonly altered in LINC mutants, some of which present pathological conditions such as envelopathies (Burke and Stewart, 2006; Janin et al., 2017). In eudicot plants, disruption of LINC components cause alterations in root hair nuclear shape phenotypes (Newman-Griffis et al., 2019; Oda and Fukuda, 2011; Tamura et al., 2013; Zhou et al., 2015a). In maize, we similarly observed that *mlks2* nuclei change to more compact and spherical than in normal cells (Fig. 5A-C). There is growing evidence that disruption of any component of the core LINC components or even the LINC-interacting nucleoskeletal proteins can cause a "rounded up" nuclear phenotype. The finding that maize GFP-*MLKS2* was able to rescue the nuclear shape phenotype in arabidopsis plants lacking three WIPs is important for two reasons. First, it represents the first demonstration of cross-species genetic rescue of a LINC component. Second, it suggests that even diverged LINC components may possess some degree of structural redundancy in establishing a balance of forces required for maintaining nuclear shape. The triple WIP rescue by a maize SINE-group KASH may reflect, therefore, the capacity of *MLKS2* to replace a NE-cytoskeletal tether normally formed by the WIP--WIT--MyosinXI-i-actin bridge (Tamura et al., 2013).

Nuclear mobility in plants is associated with a wide variety of cellular processes including symbiosis, pathogenesis, fertilization, and division planes in development (Griffis et al., 2014). Nuclear mobility can either be inferred from variable positioning in fixed cells, such as the eccentric nucleus stage of early meiotic prophase (Fig. 4), or by direct time-lapse tracking in live cells (Fig. 7F-H). Here we observed both. Our results show that the mobility of tobacco nuclei is reduced or stopped by heterologous expression of GFP-*MLKS2*, and this immobilization is reversed by removing the ARM domain region of *MLKS2*. These findings, consistent with the genetic analyses, implicate *MLKS2* in nuclear anchoring which may further explain the appearance of wild-type elongated nuclei in root hair cells (Fig. 5), for example. The lack of perinuclear actin around the meiotic nucleus in *mlks2-2* plants further suggests that *MLKS2* may function to bind or recruit filamentous actin to the perinuclear cytoplasm. In this

way, MLKS2 may play an organizational or mechanical role whereby microfilaments, microtubules, or their associated motor proteins may direct the dynamics of meiotic nuclei (Sheehan and Pawlowski, 2009).

The role of the nuclear envelope in meiotic chromosome behavior has been recognized for over a century. In recent decades, the LINC complex has been shown to be required for telomere clustering at the bouquet stage, as first described in fission yeast (Chikashige et al., 2009). Here we show that MLKS2 is required for normal bouquet formation and proper chromosome segregation. Our findings represent the first genetic evidence that a plant KASH interacts with the actin cytoskeleton during male meiosis. These results suggest that actin may be more important in plant meiosis than previously recognized. This idea is consistent with live imaging of maize meiotic prophase chromosome and nuclear movements, both of which were stopped following MF depletion by latrunculin-B treatment (Sheehan and Pawlowski, 2009). In our mutants, the earliest cytological meiotic defect is seen at the zygotene stage, when the telomere bouquet is normally formed. The *mlks2* mutants exhibit defects in telomere clustering and nuclear positioning. These early stage problems may later manifest in the failure of homologs to synapse and recombine with high fidelity. MLKS2 may also have post-bouquet functions such as interlock resolution and telomere dispersal, ideas consistent with detection of irregular and pronounced clumping at late prophase (Fig. 4G-J). The chromosome segregation laggards, micronuclei, and pollen sterility phenotypes may reflect, therefore, multiple upstream failures of disomic pairing and recombination. Interestingly, several of our *mlks2* phenotypes resemble those described for *AtPSS1*, which encodes a meiotic kinesin1-like protein (Duroc et al., 2014). Mutations in *AtPSS1* lead to partial synapsis, defects in crossover distribution, and cytogenetic phenotypes including univalents and aneuploidy. Findings such as these, together with the large body of evidence implicating microtubules in plant meiotic chromosome behavior (Cowan and Cande, 2002; Cowan et al., 2002; Driscoll and Darvey, 1970; Higgins et al., 2016; Shamina, 2003; Thomas and Kaltsikes, 1977) suggest that meiotic chromosome behaviour likely requires actin and tubulin cytoskeletal systems. Indeed, the LINC complex in general, and MLKS2 in particular may provide a coordinating structure that integrates cytoskeletal systems to affect nuclear architecture.

In conclusion, this study identifies MLKS2 as a core LINC component with multiple functions in fundamental plant vegetative and reproductive processes. Analysis of the ARM domain sheds light on how the SINE group of plant KASH proteins can interact with the actin cytoskeleton. The MLKS2 protein could extend a VELCRO-type hook into the cytoplasm to bind generally or specifically with cytoskeletal linear polymers, most likely F-actin. Phenotypic analysis revealed that MLKS2 is required for proper progression through meiotic prophase, implicating the actin cytoskeleton as

important for the specialized choreography of meiotic chromosomes that ultimately ensures euploid genome transmission. Together, these findings highlight the importance of investigating individual components of the LINC complex in order to understand how the nuclear envelope coordinates the cytoplasm and nucleus to carry out fundamental biological processes.

## MATERIALS & METHODS

### Microscopy with tobacco and arabidopsis

*Nicotiana benthamiana* (*Nb*) transformation was performed as described (Sparkes et al., 2006). Agrobacterium cultures were used at an OD of 0.05 and plants imaged 3 days post infiltration. All imaging was performed on a Zeiss LSM 800 confocal system equipped with a 100X 1.4NA lens. Bi-directional scanning was used for all imaging. For DAPI excitation the 405nm laser was used and emission collected 400-491 nm. For GFP excitation the 488 nm laser was used and emission collected between 491-617 nm. For mCherry excitation the 561 nm laser was used and emission collected from 561-620 nm. Colocalization imaging was performed with multi-track line switching to avoid fluorescence bleedthrough and 4x frame averaging was used. For FRAP acquisition a 5X digital zoom was used with a frame time of 0.15s. Fluorescence recovery was monitored by consecutive imaging of 240 frames. Bleaching was performed after 5 control frames were imaged using the 488 nm laser at 100X power for 20 iterations in a 160x160 pixel ROI containing the nuclear envelope. For nuclear movement assays nuclei were imaged at 10 s intervals for 30 frames (5 minutes). LBR-GFP used for control nuclei movement as described in (Graumann et al., 2010) . For DAPI staining, *N. benthamiana* or *A. thaliana* tissue was incubated in 5µg/ml DAPI and 0.001% Triton X-100 for 10 min before imaging.

For image analysis ZEN (Blue edition, v2.3.69.1000, Zeiss) was used and figures compiled in *Illustrator* (v22.1, Adobe). For FRAP analysis normalised intensity values were calculated as described (Martinière et al., 2012) and one-phase association for each replicate and combined curves plotted in *GraphPad* v7.04. For nuclear movement assays FIJI version 1.52h was used to generate temporal colour coded projections, kymographs (over a 25µm line) and manual tracking to quantitatively track centre of nuclear movement for each experimental condition. All whisker plots showing data points were generated in *GraphPad* v7.04. Student's T-test or one way ANOVA statistical tests were used depending on the suitability of the data, as indicated in each figure legend. The number of replicates used for each experiment can be found in the figure legends. Circularity index analysis was performed as described (Zhou et al., 2012).



## Gene constructs

Gene constructs, nomenclature, and sequence information for the clones used in this study are listed in Table S3. GFP-MLKS2 constructs were synthesized (GenScript Biotech Corp.) using the full-length ORF of MLKS2 fused to the C-terminal end of eGFP-FLAG-HA. The synthetic clone (GFP-MLKS2) was obtained in a pUC18 vector, inserted at the *Bam*HI restriction site to produce a plasmid designated pHWBF07. From this vector, eGFP-FLAG-HA-MLKS2 sequence was PCR amplified with *att* flanking primers (Table S2) using high fidelity Q5 polymerase (NEB) and cloned into pDONR221 vector by BP cloning (Cat. No. 1235019, Invitrogen) to generate the entry clone designated pHWBF07EC. The eGFP-FLAG-HA-MLKS2 sequence from entry clone was transferred to vector pH7WG2 (Karimi et al., 2002) by Gateway LR recombination (Cat. No. 1235019, Invitrogen) to obtain the expression vector designated pPK1Fexp. Deletion constructs were generated from the full length entry clone as template to PCR amplify required regions with internal primers containing flanking *att* sequences and cloned into pDONR211 by Gateway BP cloning. These deletion constructs were also subcloned in pH7WG2 destination vector by Gateway LR recombination. Full length and domain deletion constructs for ZmSUN2 were generated as described in (Gumber et al., 2019).

## Maize plant material and genotyping

The transposon insertion alleles of *MLKS2* (unique insertion IDs: mu1038603 and mu1058535) were identified through MaizeGDB (<http://www.maizegdb.org/>) and derived from the UniformMu transposon mutagenesis project (McCarty and Meeley, 2009; Settles et al., 2007). Seeds for stock number UF-Mu04133 carrying allele *mlks2-1* or stock number UF-Mu07312 carrying allele *mlks2-2* were obtained from the Maize Genetics Cooperation Stock Center (<http://maizecoop.cropsci.uiuc.edu/>). For "wild-type" maize referred to here as W22+, we used color-converted W22 obtained from Hugo Dooner (Waksman Inst., Rutgers, New Jersey, USA) derived by Brink ((Brink, 1956). The seeds were planted at the Florida State University Mission Road Research Facility (Tallahassee, FL, USA) and propagated by out-crossing to W22 in summer 2014. In the fall, the progeny seeds were grown in greenhouse in King Biological Science building, Florida State University (Tallahassee, FL). The segregating plants were self crossed to obtain mutant plants.

For PCR genotyping, leaf samples from 4 week old maize W22 and plants from families segregating for *MLKS2* alleles were harvested, frozen, and stored at -80 C. Genomic DNA was isolated using modified mini-CTAB method from approximately 2 cm<sup>2</sup> leaf tissue in 96 well plate in a Mixer Mill (Retsch®) as described (Labonne et al., 2013). Plants were genotyped using three different primer pair combinations to accurately predict the genotype as described by (McCarty et al., 2013). For *MLKS2-1*

allele, DNA extracted from all the UF-Mu04133 stock plants was individually amplified with 603F1-603R1 gene specific primer pair and also gene specific primer in combination with Tir6 primer corresponding to terminal inverted repeats of the Mu1 transposable element (603F1-Tir6 and 603R1-Tir6). Similarly, for MLKS2-2 allele, DNA extracted from all the UF-Mu07312 stock plants was individually amplified with 535F2-535R2, 535F2-Tir6 and 535R2-Tir6 primer pairs. Wild type W22 DNA was also amplified with all of these primer pairs. All the primer sequences used for genotyping are listed in Table S1. The PCR amplification products were resolved conventional agarose gel electrophoresis followed by ethidium bromide staining. The PCR products sequence-verified using TA cloning in pCR™4Blunt-TOPO® Vector (Invitrogen cat # K2875-20). M13F and M13R vector primers were used for sequencing (Molecular Cloning Facility, Department of Biological Sciences, Florida State University) and the resulting sequences were aligned with genomic the W22 reference genome sequence to validate the mu transposon element insertion sites.

### RNA extraction and qRT-PCR

After one round of outcrossing to W22 and two rounds of self crossing, seeds were grown in greenhouse to harvest meiotic tassels from V13 -stage plants. The tassels were frozen in liquid nitrogen and stored at -80 °C until further use. The tissue was ground in liquid nitrogen and 100 mg powder used for RNA extraction as per manufacturer's instructions (Qiagen RNeasy kit, Cat # 74904). The extracted RNA was treated with amplification grade DNase I (ThermoFisher, Cat # 18068015) for 15 min at room temperature followed by treatment with RNA clean and concentrator-25 kit (Zymo Research, Cat # R1017 ). The resulting RNA was inspected for quantity and quality by UV spectroscopy and gel electrophoresis, respectively. 1 ug of high quality RNA was reverse transcribed into cDNA using Superscript III reverse transcriptase (ThermoFisher, Cat# 18080093) according to the manufacturer's instructions. The resulting cDNA was used as a template to amplify ~ 100 bp products downstream of Mu1 insertion sites in *mlks2-1* and *mlks2-2* using three gene-specific primers. Two housekeeping genes CDK1 and RPN2 were amplified as internal controls (Lin et al., 2014). The products were amplified using SYBR Green Master Mix (Applied Biosystems) on a 7500 Fast Real-Time PCR System (Applied Biosystems). Relative expression change was calculated using the  $2\Delta\Delta C_t$  method (Livak and Schmittgen, 2001). Two technical replicates were carried out to ascertain the accuracy of the procedure.

### Microscopy in maize

For 3D telomere FISH analysis, meiotic stage tassels were harvested from W22 and *mlks2-2* plants grown in greenhouse. Flowers were microdissected and fixed in 1X

Buffer A with 4% paraformaldehyde for 1 hour on rotary shaker at room temperature as described (Bass et al., 1997). The fixed anthers were microdissected and embedded in acrylamide pads as described in (Howe et al., 2013) and subjected to telomere FISH using 0.13  $\mu\text{M}$  fluorescein-conjugated telomere-specific oligonucleotide probe, MTLF. The meiocytes were counterstained with 3  $\mu\text{g}/\text{mL}$  DAPI then mounted in vectashield (Vector labs) and imaged using 3D-deconvolution microscope equipped with a 60X lens and CCD camera (Deltavision, GE Healthcare). Telomere coordinates in X, Y, and Z were identified using 3D MODEL tool of SoftWorx programs (DeltaVision, GE Healthcare) and pairwise telomere distances were calculated using R software for Euclidean distances.

For actin staining, meiotic-staged anthers were fixed in PHEMS buffer supplemented with 8% paraformaldehyde for 2 hours with shaking at room temperature as described (Chan and Zacheus Cande, 1998). The fixed anthers were microdissected on a glass slide in PBS (pH 7.0) and stained with 3.3  $\mu\text{M}$  Alexa Fluor™ 594 Phalloidin (Thermo Fisher Scientific) and DAPI (1.5  $\mu\text{g}/\text{mL}$ ) for 20 min at room temperature in dark. The cells were imaged using Deltavision 3D deconvolution microscope.

For pollen viability, male flowers before dehiscence. The anthers were fixed in Carnoy's fixative (6 alcohol:3 chloroform:1 acetic acid) for a minimum of 2 hours at room temperature. The fixed anthers were placed on glass slide and stained with modified Alexander's stain containing Malachite green (0.01%), Acid Fuchsin (0.05%) and Orange G (0.005%) as described (Peterson et al., 2010) to differentiate viable magenta pollen grains from aborted green pollen grains. Bright field images of pollen grains were collected on Revolve microscope (Echo Labs). At least 300 pollen grains each from 3 plants of every genotype were counted to calculate pollen viability.

For maize root hair imaging, seeds were sterilized with 1% bleach, 0.01% Triton X-100 in deionized water for 10 min, rinsed and soaked in water overnight. The next day seeds were spread on wet paper towels kept dark and moist for 5-6 days then roots were cut off and fixed in Buffer A (Howe et al., 2013) plus 4% final paraformaldehyde for 1 hour, with rotation at room temperature. Small pieces of roots with root hair from the elongation zone were placed on glass slides and chopped to small pieces with a razor blade. The tissue was stained with 3  $\mu\text{g}/\text{mL}$  DAPI for 20 min at room temperature, mounted with vectashield, and imaged on an EVOS fluorescence microscope (Thermo Fisher Scientific). The images were processed using *Analyze particle* function of *ImageJ* to measure the longest diameter and circularity of the nuclei.

For leaf and stomatal complex imaging, plants were grown in greenhouse and the 4th leaf was harvested at its first appearance. For developing stomatal complex, up to 2 cm tissue from the base of the leaf was harvested and mature stomatal complex, remaining of the leaf was harvested and fixed in FAA fixative (3.7%, 10% Formalin, 50% ethanol and 5% acetic acid in water) for at least 15 min at room temperature as

described in (Facette et al., 2015). The leaf tissue was cut in thin longitudinal strips and treated with PBS supplemented with 1% Triton for 10 min to permeabilize the tissue. The tissue was then rinsed and incubated in a solution of propidium iodide (Life technologies) and DAPI for 30 min. The tissue was rinsed with PBS to get rid for excess dye and mounted in water. The tissue was imaged on 3D deconvolution microscope at 60X.

## Figure Legends

### Figure 1: Gene model and protein domain diagram of *MLKS2*.

A) Gene model diagram for *MLKS2* with gene features drawn to scale. The total length of the primary transcript (transcript model for B73v4 is indicated above) is 3007 bp. There are three exons shown as black boxes. The 5'UTR of the gene is interrupted by "Intron 1". Gene features are indicated: TSS, transcription start site; UTR, untranslated region; ORF, open reading frame. B) The amino acid sequence of *MLKS2* with domains underlined with lines of different styles or box. The protein sequence is identical to that from genotype W22 (not shown) used for transposon mutagenesis. The key is given under the sequence. C) Domain diagram for *MLKS2* showing the names and locations of 2ndary structural features (alpha helices) or domains are indicated. The conserved terminal four amino residues (LVPT) at the end of the KASH domain are shown. D) The I-TASSER protein structure prediction software was used with *MLKS2* as input sequence. The top-ranked structural homolog is shown for a predicted tertiary structure of *MLKS2* (1st panel) next to the known structure of PP2A structural subunit (pdb 1b3uA)(2nd panel, followed by an overlay of the two (3rd panel). The rainbow annotation denotes the protein polarity from the N-terminus (blue) to the C-terminus (red). The transmembrane (TMD) and KASH domains of *MLKS2* are annotated.

### Figure 2: *MLKS2* cellular localization and *ZmSUN2*-interaction.

Subcellular localization of full length and deletion mutants of GFP-*MLKS2* in transiently expressing *N. benthamiana* leaf cells as previously described (Gumber et al., 2019). A) Domain deletion diagram of all constructs used showing the ARM domain (yellow), disordered regions (blue), transmembrane domain (TM), KASH domain (purple), terminal AA residues, and stop codon (\*). B) Full length GFP-*MLKS2* (green) and all but one deletion mutant localise to the NE around DAPI-stained chromatin (magenta). GFP-*MLKS2* $\Delta$ TM appears soluble and distributed throughout the nucleoplasm. A cell periphery network-like pattern was observed for all constructs with GFP-*MLKS2* $\Delta$ TM appearing as soluble in the cytoplasm and GFP-*MLKS2* $\Delta$ ARM appearing as associated

with the ER. C) Fluorescence recovery curve from MLKS2 FRAP alone or when co-expressed with mCherry-ZmSUN2, mCherry-ZmSUN2 $\Delta$ CC (without coiled coil domain), or mCherry-ZmSUN2 $\Delta$ SUN (without SUN domain). D) FRAP recovery plateau values for fluorescence recovery curves shown in C). E) Fluorescence recovery curves showing increased mobile fraction in the NE for KASH or ARM domain deletion variants of GFP-MLKS2. F) FRAP recovery plateau values of MLKS2 and MLKS2 $\Delta$ KASH and MLKS2 $\Delta$ ARM shown in D). Scale bar denotes 10  $\mu$ m. For whisker plots blue lines denotes SD error bars, red mean. N =  $\leq$ 30 nuclei imaged across three experimental repeats per treatment. ANOVA statistical test used where Ns =  $P \geq 0.05$ , \*\*\* =  $P \leq 0.001$  and \*\*\*\* =  $P \leq 0.0001$ .

**Figure 3. Genotypic characterization of *MLKS2* alleles.** Two transposon-tagged alleles of *MLKS2*, *mlks2-1* and *mlks2-2*. A) *MLKS2* gene model showing the location of *Mu1* transposon insertion sites (triangles) for two alleles. The positions of allele specific primer pairs (gF1, gR1 and gF2, gR2) and Tir6 primer (T6) at the terminal inverted repeat sequence of *Mu1* transposon are marked with arrows. The positions of primer pairs (qF1, qR1; qF2, qR2; or qF3, qR3) used for qRT-PCR are also marked with arrows. The PCR products (21FR, 21FT, 21TR, 22FR, 22FT, and 22TF) used for sequence verification, genotyping, and quantitative RT-PCR are indicated below the gene model. B) Sequences aligned around the insertion site include the published parental sequence (Springer et al., 2018), the wild-type allele from PCR products ("a" and "d") from W22+, and the mutator-flanking sequences from PCR products ("b", "c", "e", and "f") using one gene primer and one mutator-specific primer (T6). In both alleles, a 9-bp duplication (underlined) was detected. C) Agarose gels showing PCR products amplified from W22+ and plants from families segregating for *mlks2-1* (top gel) or *mlks2-2* (bottom gel) allele. The PCR products were amplified using gene specific primer pairs (lanes/PCR products a, d) or primer pairs from one gene specific primer and one mutator (T6) primer (lanes/PCR products b, c, e, f). The plant genotypes are shown on the top of the gels and the primer pairs and band sizes are indicated on the right. The lanes "M" contain 100 bp DNA marker fragments at the lengths indicated in base pair. D) Fold change in the transcript levels of *MLKS2* in families segregating for *mlks2-1* or *mlks2-2*; homozygous wild type siblings (+/+) or homozygous mutant plants (-/-) were quantified relative to W22+ using an average of 3 primer pairs (qF1-qR1, qF2-qR2, qF3-qR3) as measured by qRT-PCR.

**Figure 4: Multiple meiotic and post-meiotic defects of *mlks2* mutants.**

Cytological defects of *mlks2-2* during and after male meiosis. A) Early prophase stage

W22+ meicyte nucleus showing a typical bouquet (green dots, "bq") of NE-associated telomeres visualized in the nucleus (DAPI, shown in magenta) using the 3D acrylamide oligo FISH method (Bass et al., 1997). B) Partial telomere bouquet in *mlks2-2* mutant at meiotic prophase, showing unusually distant telomeres (arrows) relative to the main bouquet (bq) telomere cluster region. C) Histogram showing bouquet-stage telomere pairwise distance distributions plotted as log<sub>2</sub> fold change mutant/wild-type per 1 micron distance bins (n=6 W22+, n=11 *mlks2-2*). The mutant has a pronounced increase the longer telomere-to-telomere distance bins. Nuclear position phenotypes for normal D) or mutant E) cells shown as projections from the middle-most 1/5 of the optical sections through the nuclei stained with DAPI, including traces around the cell and nuclear peripheries to ascertain 2D centroid locations. F) Eccentricity plots showing the distribution of distances of between the pairwise centroids of nuclei and cells for normal (W22) and mutant (*mlks2*) meicytes at at the bouquet stage, using the same nuclei as those analyzed in A)-C). G) Late prophase stage W22+ meicyte showing bivalents spread throughout the volume of the nucleus. H-J) Late prophase stage *mlks2-2* meicytes showing clumping of bivalents. K) W22+ meicyte showing bivalents on a normal meiosis I metaphase plate. L-N) Mutant *mlks2-2* meicytes showing one or more chromosomes not located (arrows) in the meiosis I metaphase plate. O) W22+ meicyte at late anaphase or early telophase. P-Q) Mutant *mlks2-2* late anaphase or early telophase showing irregularly positioned, "laggard" chromosomes (arrows). R) Mutant *mlks2-2* at telophase after meiosis I, before meiosis II, and showing micronuclei (arrows) that are associated with failure of chromosomes or chromosomal fragments to reach the spindle poles. S-U) Pollen viability stains for wild-type S) or mutant T), U) pollen. Dark purple indicates viable pollen, light blue indicates inviable pollen. V) Quantification of pollen viability with n=1,000 or more for each genotype.

**Figure 5. MLKS2 is required for the elongated nuclear shape phenotype in root hair cells.**

A) Root hair nuclei stained with DAPI in W22+, *mlks2-1* and *mlks2-2* maize plants. B) Quantitation of longest dimension of nuclei from W22+, *mlks2-1*, or *mlks2-2* root hair nuclei. C) Circularity index measurements of nuclei from W22+, *mlks2-1* and *mlks2-2* in which 1.0 represents a perfectly round shape. (D, E) Images of Arabidopsis DAPI-stained nuclei from genetic rescue of nuclear shape phenotypes. Images are from leaf (D) or root (E) nuclei from three genotypes: *Arabidopsis thaliana* wild type (Col0); (Columbia wild type strain), *wip123* (AtWIP-type KASH triple mutant where *wip123* refers to genotype *wip1-1*, *wip2-1*, *wip3-1*) (Zhou et al., 2015b), or *wip123* plus GFP-MLKS2 (WIP triple mutant transformed with GFP-MLKS2). (F,G) Nuclear circularity index summaries for these same tissues and genotypes are shown below each tissue/genotype combination. Arabidopsis WIP triple mutant nuclei are significantly

more rounded (leaf CI=0.81 $\pm$ 0.03; root CI=0.72 $\pm$ 0.02) than wild type (leaf CI=0.56 $\pm$ 0.03; root CI=0.39 $\pm$ 0.02) whereas GFP-MLKS2 complemented nuclei are similar to wild type (leaf CI=0.52 $\pm$ 0.03, root CI=0.32 $\pm$ 0.02);  $p > 0.05 = ns$ ,  $p < 0.0001 = ****$ .

### **Figure 6. MLKS2 is required for normal stomatal complex development.**

DAPI stained mature stomatal complex in leaf from wild-type W22+ (A-C), *mlks2-1* (D-F) or *mlks2-2* (G-I) plants. For comparison, a typical stomatal complex has bilateral symmetry with two elongated central dumbbell shaped guard cells (GC) flanked by two outer subsidiary cells (SC). In the *mlks2-1* (D-F) or *mlks2-2* (G-I) mutants, subsidiary cells appear abnormal (arrows) in their number, shape, or nuclear position relative to the guard cells. J-L) Representative images from early stage of stomatal development where subsidiary mother cells (SMC) are polarizing with nuclei migrating towards the guard mother cells (GMC). Interstomatal cells (ISC) are annotated for W22. M-O) Representative images of developing stomatal complex after SMC polarization. Boundaries of abnormally shaped cells or cells with abnormal nuclear positioning are marked with dotted lines. Scale bars denote 15  $\mu$ m.

### **Figure 7. MLKS2 interaction with actin.**

Co-localization of ER marker (RFP-HDEL, magenta) or actin marker (RFP-LifeAct, magenta) with A) GFP-MLKS2 or B) GFP-MLKS2 $\Delta$ ARM. C) GFP-MLKS2 localization in F-actin-depleted cells (25  $\mu$ M Lat-B) phenocopies GFP-MLKS2 $\Delta$ ARM with an ER-like staining pattern. D) Depolymerization of the actin cytoskeleton with Lat-B results in increased GFP-MLKS2 FRAP recovery. E) FRAP Plateau value of MLKS2 mock and Lat-B treated as shown in D). For whisker plots, blue lines denotes SD error bars, red mean. Student's T-test used to test statistical significance. \*\*\*\* =  $P \leq 0.0001$ . Scale bar denotes 10  $\mu$ m. F) Temporal color-coded projections of randomly selected LBR, MLKS2, MLKS2 $\Delta$ KASH and MLKS2 $\Delta$ ARM nuclei imaged every 10 seconds over 5 minutes. G) Kymographs of nuclei movement shown in F) for a different nucleus. H) Quantification of total nuclei movement over time imaged for LBR, MLKS2, MLKS2 $\Delta$ KASH and MLKS2 $\Delta$ ARM. N = at least 30 nuclei imaged across three experimental repeats per treatment. ANOVA statistical test used. Ns =  $P \geq 0.05$ , \* =  $P \leq 0.05$ , \*\* =  $P \leq 0.001$  and \*\*\*\* =  $P \leq 0.0001$ . (I-L) DAPI (magenta) and phalloidin (green) stained early prophase maize meiocytes. (M-P) Gray scale images of phalloidin staining of cells shown in panels I-L. Line trace plots show intensity of phalloidin in the middle of the cell marked by horizontal band, illustrating the spike in perinuclear actin in wild-type

but not mutant nuclei.

### **Figure 8. Summary diagrams and models of ZmMLKS2.**

A summary diagram illustrates how MLKS2 may interact with F-actin to produce the genetic and heterologous expression phenotypes reported in this study. A) MLKS2 is presumed be arranged with an ARM domain-contai alpha solenoid structure in the cytoplasm where it interacts with F-actin directly (left half) or indirectly through a hypothetical connector depicted by the boxed question mark (right half). B) The *mks2-2* mutant has lost the ability to bind or contribute to the recruitment of F-actin. Not depicted here are data from MLKS2 in vegetative (leaf, root) organs. Results from kymograph analysis of GFP-MLKS2 expressed in *N. benthamiana* are summarized for experiments that showed C) anchored nuclei in cells expressing full length MLKS2 or MLKS2 $\Delta$ KASH or D) mobile nuclei in cells expressing a control NE marker (*lbr*) or MLKS $\Delta$ ARM. In these diagrams, evidence for interaction with ZmSUN2 co-expression is indicated (red) on the basis of FRAP assays or depicted from presumed interactions with tobacco SUN, NbSUN (grey). In these diagrams (C,D), the MLKS2 interaction with F-actin is depicted as direct for convenience, but the alternative indirect mode (A, right half) of MLKS2 interaction with F-actin remains a formal possibility.

**Figure S1. Individual nuclei data from FRAP experiments presented throughout the main figures.** A) FRAP recovery curves from all individual nuclei imaged with GFP-MLKS2 for comparison to co-expression with SUN2. B) FRAP recovery curves from all individual nuclei imaged with GFP-MLKS2 and co-expressing mCherry-SUN2. C) FRAP recovery curves from all individual nuclei imaged with GFP-MLKS2 and co-expressing mCherry-SUN2 $\Delta$ CC. D) FRAP recovery curves from all individual nuclei imaged with GFP-MLKS2 and co-expressing mCherry-SUN2 $\Delta$ SUN. E) Halftime values from FRAP recovery experiments shown in A-D. F) FRAP recovery curves from all individual nuclei imaged with GFP-MLKS2 as control during GFP-MLKS2 $\Delta$ KASH and GFP-MLKS2 $\Delta$ ARM experiments. G) FRAP recovery curves from all individual nuclei imaged with GFP-MLKS2 $\Delta$ KASH. H) FRAP recovery curves from all individual nuclei imaged with GFP-MLKS2 $\Delta$ ARM. I) Halftime values from FRAP recovery experiments shown in F-H. J) FRAP recovery curves from all individual nuclei imaged with GFP-MLKS2 after 1 hour mock treatment, for comparison to Lat-B treatment. K) ) FRAP recovery curves from all individual nuclei imaged with GFP-MLKS2 after 1 hour 25 $\mu$ M LatB treatment. L) Halftime values from FRAP recovery experiments shown in J and K. Recovery curves blue dots show individual data points, black lines individual fluorescence recovery



curves, and red curves average recovery curves for all nuclei. For whisker plots, blue lines denote error bars showing standard deviation, red lines show mean values. Statistical tests performed were either One-way ANOVA (E and I) or Student's t-test (L) as appropriate. ns =  $P \geq 0.05$ , \*\* =  $P \leq 0.01$ .

## Figure S2. Co-expression of GFP-MLKS2 and tubulin alpha-5 (TUA5)

Representative images of *N. benthamiana* leaves transiently co-transformed with GFP-MLKS2 and mcherry-TUA5. MLKS2 and microtubules do not seem to colocalize. Scale bar denotes 10  $\mu\text{m}$ .

## References

- Alam, S. G., Zhang, Q., Prasad, N., Li, Y., Chamala, S., Kuchibhotla, R., Kc, B., Aggarwal, V., Shrestha, S., Jones, A. L., et al. (2016). The mammalian LINC complex regulates genome transcriptional responses to substrate rigidity. *Sci. Rep.* **6**, 38063.
- Barker, R. F., Thompson, D. V., Talbot, D. R., Swanson, J. and Bennetzen, J. L. (1984). Nucleotide sequence of the maize transposable element *Mul*. *Nucleic Acids Res.* **12**, 6924–6924.
- Bass, H. W., Marshall, W. F., Sedat, J. W., Agard, D. A. and Cande, W. Z. (1997). Telomeres cluster de novo before the initiation of synapsis: a three-dimensional spatial analysis of telomere positions before and during meiotic prophase. *J. Cell Biol.* **137**, 5–18.
- Brink, R. A. (1956). A Genetic Change Associated with the R Locus in Maize Which Is Directed and Potentially Reversible. *Genetics* **41**, 872–889.
- Burke, B. and Roux, K. J. (2009). Nuclei take a position: managing nuclear location. *Dev. Cell* **17**, 587–597.
- Burke, B. and Stewart, C. L. (2006). The laminopathies: the functional architecture of the nucleus and its contribution to disease. *Annu. Rev. Genomics Hum. Genet.* **7**, 369–405.
- Chan, A. and Zacheus Cande, W. (1998). Maize meiotic spindles assemble around chromatin and do not require paired chromosomes. *J. Cell Sci.* **111**, 3507–3515.
- Chang, W., Worman, H. J. and Gundersen, G. G. (2015). Accessorizing and anchoring the LINC complex for multifunctionality. *J. Cell Biol.* **208**, 11–22.
- Chikashige, Y., Yamane, M., Okamasa, K., Tsutsumi, C., Kojidani, T., Sato, M., Haraguchi, T. and Hiraoka, Y. (2009). Membrane proteins Bqt3 and -4 anchor telomeres to the nuclear envelope to ensure chromosomal bouquet formation. *J. Cell Biol.* **187**, 413–427.
- Coates, J. C. (2003). Armadillo repeat proteins: beyond the animal kingdom. *Trends Cell Biol.* **13**, 463–471.
- Cowan, C. R. and Cande, W. Z. (2002). Meiotic telomere clustering is inhibited by colchicine but does not require cytoplasmic microtubules. *J. Cell Sci.* **115**, 3747–3756.
- Cowan, C. R., Carlton, P. M. and Cande, W. Z. (2002). Reorganization and polarization of the meiotic bouquet-stage cell can be uncoupled from telomere clustering. *J. Cell Sci.* **115**, 3757–3766.
- D'Angelo, M. A. (2018). Nuclear pore complexes as hubs for gene regulation. *Nucleus* **9**, 142–148.
- Deeks, M. J., Calcutt, J. R., Ingle, E. K. S., Hawkins, T. J., Chapman, S., Richardson, A. C., Mentlak, D. A., Dixon, M. R., Cartwright, F., Smertenko, A. P., et al. (2012). A Superfamily of Actin-Binding Proteins at the Actin-Membrane Nexus of Higher Plants. *Curr. Biol.* **22**, 1595–1600.
- Dittmer, T. A. and Richards, E. J. (2008). Role of LINC proteins in plant nuclear morphology. *Plant Signal. Behav.* **3**, 485–487.
- Driscoll, C. J. and Darvey, N. L. (1970). Chromosome pairing: effect of colchicine on an isochromosome. *Science* **169**, 290–291.
- Duroc, Y., Lemhemdi, A., Larchevêque, C., Hurel, A., Cuacos, M., Cromer, L., Horlow, C., Armstrong, S. J., Chelysheva, L. and Mercier, R. (2014). The kinesin AtPSS1 promotes synapsis

- and is required for proper crossover distribution in meiosis. *PLoS Genet.* **10**, e1004674.
- Evans, D. E., Pawar, V., Smith, S. J. and Graumann, K.** (2014). Protein interactions at the higher plant nuclear envelope: evidence for a linker of nucleoskeleton and cytoskeleton complex. *Front. Plant Sci.* **5**, 183.
- Facette, M. R., Park, Y., Sutimantanapi, D., Luo, A., Cartwright, H. N., Yang, B., Bennett, E. J., Sylvester, A. W. and Smith, L. G.** (2015). The SCAR/WAVE complex polarizes PAN receptors and promotes division asymmetry in maize. *Nat Plants* **1**, 14024.
- Fournier, D., Palidwor, G. A., Shcherbinin, S., Szengel, A., Schaefer, M. H., Perez-Iratxeta, C. and Andrade-Navarro, M. A.** (2013). Functional and genomic analyses of alpha-solenoid proteins. *PLoS One* **8**, e79894.
- Giannoutsou, E. P., Apostolakos, P. and Galatis, B.** (2011). Actin filament-organized local cortical endoplasmic reticulum aggregations in developing stomatal complexes of grasses. *Protoplasma* **248**, 373–390.
- Godfray, H. C. J., Beddington, J. R., Crute, I. R., Haddad, L., Lawrence, D., Muir, J. F., Pretty, J., Robinson, S., Thomas, S. M. and Toulmin, C.** (2010). Food security: the challenge of feeding 9 billion people. *Science* **327**, 812–818.
- Graumann, K., Runions, J. and Evans, D. E.** (2010). Characterization of SUN-domain proteins at the higher plant nuclear envelope. *Plant J.* **61**, 134–144.
- Graumann, K., Vanrobays, E., Tutois, S., Probst, A. V., Evans, D. E. and Tatout, C.** (2014). Characterization of two distinct subfamilies of SUN-domain proteins in Arabidopsis and their interactions with the novel KASH-domain protein AtTIK. *J. Exp. Bot.* **65**, 6499–6512.
- Griffis, A. H. N., Groves, N. R., Zhou, X. and Meier, I.** (2014). Nuclei in motion: movement and positioning of plant nuclei in development, signaling, symbiosis, and disease. *Front. Plant Sci.* **5**, 129.
- Groves, N. R., Biel, A. M., Newman-Griffis, A. H. and Meier, I.** (2018). Dynamic Changes in Plant Nuclear Organization in Response to Environmental and Developmental Signals. *Plant Physiol.* **176**, 230–241.
- Gumber, H. K., McKenna, J. F., Estrada, A. L., Tolmie, A. F., Graumann, K. and Bass, H. W.** (2019). Identification and characterization of genes encoding the nuclear envelope LINC complex in the monocot species *Zea mays*. *J. Cell Sci.* **132**, 1–16.
- Gundersen, G. G. and Worman, H. J.** (2013). Nuclear positioning. *Cell* **152**, 1376–1389.
- Hagan, I. and Yanagida, M.** (1995). The product of the spindle formation gene *sad1+* associates with the fission yeast spindle pole body and is essential for viability. *J. Cell Biol.* **129**, 1033–1047.
- Hatzfeld, M.** (1998). The Armadillo Family of Structural Proteins. In *International Review of Cytology* (ed. Jeon, K. W.), pp. 179–224. Academic Press.
- Hawkins, T. J., Deeks, M. J., Wang, P. and Hussey, P. J.** (2014). The evolution of the actin binding NET superfamily. *Front. Plant Sci.* **5**, 254.
- Hetzer, M. W.** (2010). The nuclear envelope. *Cold Spring Harb. Perspect. Biol.* **2**, a000539.
- Hieda, M.** (2017). Implications for Diverse Functions of the LINC Complexes Based on the Structure. *Cells* **6**.
- Higgins, D. M., Nannas, N. J. and Dawe, R. K.** (2016). The Maize Divergent spindle-1 (*dv1*) Gene Encodes a Kinesin-14A Motor Protein Required for Meiotic Spindle Pole Organization. *Front. Plant Sci.* **7**, 1277.
- Howe, E. S., Murphy, S. P. and Bass, H. W.** (2013). Three-Dimensional Acrylamide Fluorescence In Situ Hybridization for Plant Cells. In *Plant Meiosis: Methods and Protocols* (ed. Pawlowski, W. P.), Grelon, M.), and Armstrong, S.), pp. 53–66. Totowa, NJ: Humana Press.
- Huelsmann, S. and Brown, N. H.** (2014). Nuclear positioning by actin cables and perinuclear actin: Special and general? *Nucleus* **5**, 219–223.
- Janin, A., Bauer, D., Ratti, F., Millat, G. and Méjat, A.** (2017). Nuclear envelopathies: a complex LINC between nuclear envelope and pathology. *Orphanet J. Rare Dis.* **12**, 147.
- Karimi, M., Inzé, D. and Depicker, A.** (2002). GATEWAY™ vectors for Agrobacterium-mediated plant transformation. *Trends Plant Sci.* **7**, 193–195.
- Kim, D. I., Birendra, K. C. and Roux, K. J.** (2015). Making the LINC: SUN and KASH protein interactions. *Biol. Chem.* **396**, 295–310.
- Labonne, J. D. J., Dorweiler, J. E. and McGinnis, K. M.** (2013). Changes in nucleosome position at transcriptional start sites of specific genes in *Zea mays* mediator of paramutation1 mutants.

*Epigenetics* **8**, 398–408.

- Lin, F., Jiang, L., Liu, Y., Lv, Y., Dai, H. and Zhao, H.** (2014). Genome-wide identification of housekeeping genes in maize. *Plant Mol. Biol.* **86**, 543–554.
- Link, J., Leubner, M., Schmitt, J., Göb, E., Benavente, R., Jeang, K.-T., Xu, R. and Alsheimer, M.** (2014). Analysis of meiosis in SUN1 deficient mice reveals a distinct role of SUN2 in mammalian meiotic LINC complex formation and function. *PLoS Genet.* **10**, e1004099.
- Livak, K. J. and Schmittgen, T. D.** (2001). Analysis of relative gene expression data using real-time quantitative PCR and the 2- $\Delta\Delta$ CT method. *Methods* **25**, 402–408.
- Luxton, G. W. G. and Starr, D. A.** (2014). KASHing up with the nucleus: novel functional roles of KASH proteins at the cytoplasmic surface of the nucleus. *Curr. Opin. Cell Biol.* **28**, 69–75.
- Malone, C. J., Fixsen, W. D., Horvitz, H. R. and Han, M.** (1999). UNC-84 localizes to the nuclear envelope and is required for nuclear migration and anchoring during *C. elegans* development. *Development* **126**, 3171–3181.
- Martinière, A., Lavagi, I., Nageswaran, G., Rolfe, D. J., Maneta-Peyret, L., Luu, D.-T., Botchway, S. W., Webb, S. E. D., Mongrand, S., Maurel, C., et al.** (2012). Cell wall constrains lateral diffusion of plant plasma-membrane proteins. *Proc. Natl. Acad. Sci. U. S. A.* **109**, 12805–12810.
- McCarty, D. R. and Meeley, R. B.** (2009). Transposon Resources for Forward and Reverse Genetics in Maize. In *Handbook of Maize: Genetics and Genomics* (ed. Bennetzen, J. L.) and Hake, S.), pp. 561–584. New York, NY: Springer New York.
- McCarty, D. R., Suzuki, M., Hunter, C., Collins, J., Avigne, W. T. and Koch, K. E.** (2013). Genetic and Molecular Analyses of UniformMu Transposon Insertion Lines. In *Plant Transposable Elements: Methods and Protocols* (ed. Peterson, T.), pp. 157–166. Totowa, NJ: Humana Press.
- Meier, I.** (2016). LINCing the eukaryotic tree of life - towards a broad evolutionary comparison of nucleocytoplasmic bridging complexes. *J. Cell Sci.* **129**, 3523–3531.
- Meier, I., Zhou, X., Brkljacić, J., Rose, A., Zhao, Q. and Xu, X. M.** (2010). Targeting proteins to the plant nuclear envelope. *Biochem. Soc. Trans.* **38**, 733–740.
- Meier, I., Richards, E. J. and Evans, D. E.** (2017). Cell Biology of the Plant Nucleus. *Annu. Rev. Plant Biol.* **68**, 139–172.
- Moriguchi, K., Suzuki, T., Ito, Y., Yamazaki, Y., Niwa, Y. and Kurata, N.** (2005). Functional isolation of novel nuclear proteins showing a variety of subnuclear localizations. *Plant Cell* **17**, 389–403.
- Müller, S., Wright, A. J. and Smith, L. G.** (2009). Division plane control in plants: new players in the band. *Trends Cell Biol.* **19**, 180–188.
- Murphy, S. P., Gumber, H. K., Mao, Y. and Bass, H. W.** (2014). A dynamic meiotic SUN belt includes the zygotene-stage telomere bouquet and is disrupted in chromosome segregation mutants of maize (*Zea mays* L.). *Front. Plant Sci.* **5**, 314.
- Newman-Griffis, A. H., Del Cerro, P., Charpentier, M. and Meier, I.** (2019). Medicago LINC Complexes Function in Nuclear Morphology, Nuclear Movement, and Root Nodule Symbiosis. *Plant Physiol.* **179**, 491–506.
- Oda, Y. and Fukuda, H.** (2011). Dynamics of Arabidopsis SUN proteins during mitosis and their involvement in nuclear shaping. *Plant J.* **66**, 629–641.
- Peterson, R., Slovin, J. P. and Chen, C.** (2010). A simplified method for differential staining of aborted and non-aborted pollen grains. *11*, e13–e13.
- Poulet, A., Probst, A. V., Graumann, K., Tatout, C. and Evans, D.** (2017a). Exploring the evolution of the proteins of the plant nuclear envelope. *Nucleus* **8**, 46–59.
- Poulet, A., Duc, C., Voisin, M., Desset, S., Tutois, S., Vanrobays, E., Benoit, M., Evans, D. E., Probst, A. V. and Tatout, C.** (2017b). The LINC complex contributes to heterochromatin organisation and transcriptional gene silencing in plants. *J. Cell Sci.* **130**, 590–601.
- Sakamoto, Y. and Takagi, S.** (2013). LITTLE NUCLEI 1 and 4 regulate nuclear morphology in *Arabidopsis thaliana*. *Plant Cell Physiol.* **54**, 622–633.
- Settles, A. M., Holding, D. R., Tan, B. C., Latshaw, S. P., Liu, J., Suzuki, M., Li, L., O'Brien, B. A., Fajardo, D. S., Wroclawska, E., et al.** (2007). Sequence-indexed mutations in maize using the UniformMu transposon-tagging population. *BMC Genomics* **8**, 116.
- Shamina, N. V.** (2003). [Dynamics of cytoskeleton microtubules in higher plant meiosis. I. The perinuclear band of microtubules and the meiotic spindle formation]. *Tsitologija* **45**, 650–654.
- Sheehan, M. J. and Pawlowski, W. P.** (2009). Live imaging of rapid chromosome movements in meiotic prophase I in maize. *Proc. Natl. Acad. Sci. U. S. A.* **106**, 20989–20994.

- Smith, L. G.** (2001). Plant cell division: building walls in the right places. *Nat. Rev. Mol. Cell Biol.* **2**, 33–39.
- Sosa, B. A., Rothballer, A., Kutay, U. and Schwartz, T. U.** (2012). LINC complexes form by binding of three KASH peptides to domain interfaces of trimeric SUN proteins. *Cell* **149**, 1035–1047.
- Sparkes, I. A., Runions, J., Kearns, A. and Hawes, C.** (2006). Rapid, transient expression of fluorescent fusion proteins in tobacco plants and generation of stably transformed plants. *Nat. Protoc.* **1**, 2019–2025.
- Springer, N. M., Anderson, S. N., Andorf, C. M., Ahern, K. R., Bai, F., Barad, O., Barbazuk, W. B., Bass, H. W., Baruch, K., Ben-Zvi, G., et al.** (2018). The maize W22 genome provides a foundation for functional genomics and transposon biology. *Nat. Genet.* **50**, 1282–1288.
- Starr, D. A. and Fridolfsson, H. N.** (2010). Interactions between nuclei and the cytoskeleton are mediated by SUN-KASH nuclear-envelope bridges. *Annu. Rev. Cell Dev. Biol.* **26**, 421–444.
- Starr, D. A. and Han, M.** (2002). Role of ANC-1 in tethering nuclei to the actin cytoskeleton. *Science* **298**, 406–409.
- Stelpflug, S. C., Sekhon, R. S., Vaillancourt, B., Hirsch, C. N., Buell, C. R., de Leon, N. and Kaeppler, S. M.** (2016). An Expanded Maize Gene Expression Atlas based on RNA Sequencing and its Use to Explore Root Development. *Plant Genome* **9**.
- Tamura, K., Iwabuchi, K., Fukao, Y., Kondo, M., Okamoto, K., Ueda, H., Nishimura, M. and Hara-Nishimura, I.** (2013). Myosin XI-i links the nuclear membrane to the cytoskeleton to control nuclear movement and shape in Arabidopsis. *Curr. Biol.* **23**, 1776–1781.
- Thomas, J. B. and Kaltsikes, P. J.** (1977). THE EFFECT OF COLCHICINE ON CHROMOSOME PAIRING. *Can. J. Genet. Cytol.* **19**, 231–249.
- Uzer, G., Rubin, C. T. and Rubin, J.** (2016). Cell Mechanosensitivity is Enabled by the LINC Nuclear Complex. *Curr Mol Biol Rep* **2**, 36–47.
- Van de Vosse, D. W., Wan, Y., Wozniak, R. W. and Aitchison, J. D.** (2011). Role of the nuclear envelope in genome organization and gene expression. *Wiley Interdiscip. Rev. Syst. Biol. Med.* **3**, 147–166.
- Varas, J., Graumann, K., Osman, K., Pradillo, M., Evans, D. E., Santos, J. L. and Armstrong, S. J.** (2015). Absence of SUN1 and SUN2 proteins in Arabidopsis thaliana leads to a delay in meiotic progression and defects in synapsis and recombination. *Plant J.* **81**, 329–346.
- Wang, S., Stoops, E., Cp, U., Markus, B., Reuveny, A., Ordan, E. and Volk, T.** (2018). Mechanotransduction via the LINC complex regulates DNA replication in myonuclei. *J. Cell Biol.* **217**, 2005–2018.
- Xu, X. M., Meulia, T. and Meier, I.** (2007). Anchorage of plant RanGAP to the nuclear envelope involves novel nuclear-pore-associated proteins. *Curr. Biol.* **17**, 1157–1163.
- Zhou, X. and Meier, I.** (2013). How plants LINC the SUN to KASH. *Nucleus* **4**, 206–215.
- Zhou, X., Graumann, K., Evans, D. E. and Meier, I.** (2012). Novel plant SUN–KASH bridges are involved in RanGAP anchoring and nuclear shape determination. *J. Cell Biol.* **196**, 203–211.
- Zhou, X., Graumann, K., Wirthmueller, L., Jones, J. D. G. and Meier, I.** (2014). Identification of unique SUN-interacting nuclear envelope proteins with diverse functions in plants. *J. Cell Biol.* **205**, 677–692.
- Zhou, X., Groves, N. R. and Meier, I.** (2015a). Plant nuclear shape is independently determined by the SUN-WIP-WIT2-myosin XI-i complex and CRWN1. *Nucleus* **6**, 144–153.
- Zhou, X., Groves, N. R. and Meier, I.** (2015b). SUN anchors pollen WIP-WIT complexes at the vegetative nuclear envelope and is necessary for pollen tube targeting and fertility. *J. Exp. Bot.* **66**, 7299–7307.

**A**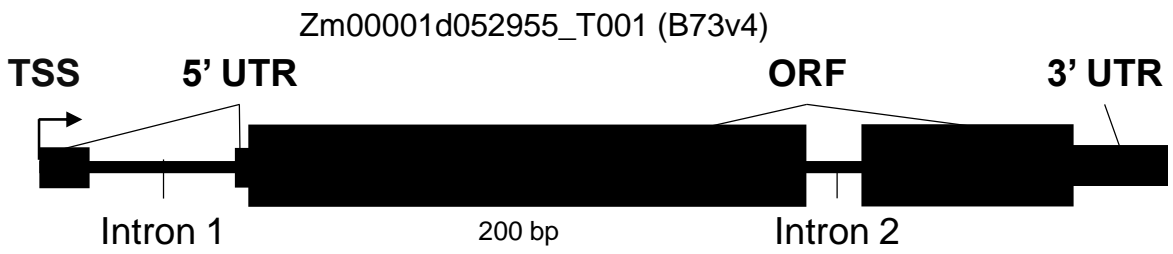**B**

1 MGRSLSP~~LLR~~ QELDNLDKDA DSRRAAMKAL KSYARHLDSK SIPHFLAEVS DTTAAGAGAG  
 bioRxiv preprint doi: <https://doi.org/10.1101/609594>; this version posted April 29, 2019. The copyright holder for this preprint (which was  
 certified by peer review) is the author/funder. All rights reserved. No reuse allowed without permission.

61 SGMP~~TGG~~EFT ~~ISL~~YEV~~LARV~~ HGRN~~IV~~FOIG NIM~~AT~~MC~~TL~~ SSSGG~~SF~~PLH QACSKV~~VPAI~~

121 ARHGIDPSAP DGEKAGIIAS LCRPLCSALM GGSQDGGGAAS GAALCLKALV ESSNWR~~FASG~~

181 ELVNEVCLKV AGAMHDSATR SNAHMGLAMA LVKHNGLIAE AYARSIVRSG LQILDGDTAD

241 SSSQKRLSAI QMINFFMKFV DPRCL~~SSELG~~ RVIDVMERCQ NDRMPFV~~RGA~~ AFEASQ~~SARN~~

301 IAAQKGSRHE VGTSPMVGSN FHKRREKSPC RSLWGAKRSP AASTMAAASP VQFRSPESQV

361 VDSSIMNGST LHDSPVSVGQ SSCNFDQ~~SRR~~ TNRR~~LWS~~NDA VDVSLKDGLF IQLCSNSNSY

421 EDDLGEVCDS EVTDANFECT NTFAGFVSPS HNGSISRDKT PSPRASDRPI NIDDVKIYST

481 PRKLLRLLQS SYDSDSASNI GQSTAKLRGL SSPDQE~~HKGL~~ VISSEQM~~QSL~~ HSDNKGDEM~~K~~

541 DENETIYMQN SKGRTQ~~TLN~~ ADASVLSTTE AENTSIKTSP EIELNGDDVC ITSSIGKTRK

601 YRAKFTLFLS VIVIFLAIIT MLIRIENDD SAYLVPT\*

α-helix                      Transmembrane domain                      KASH domain

**C**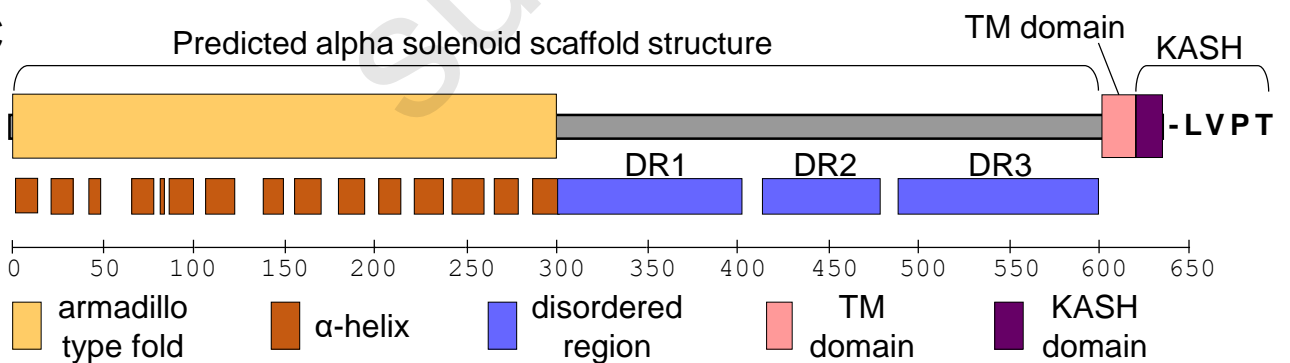**D**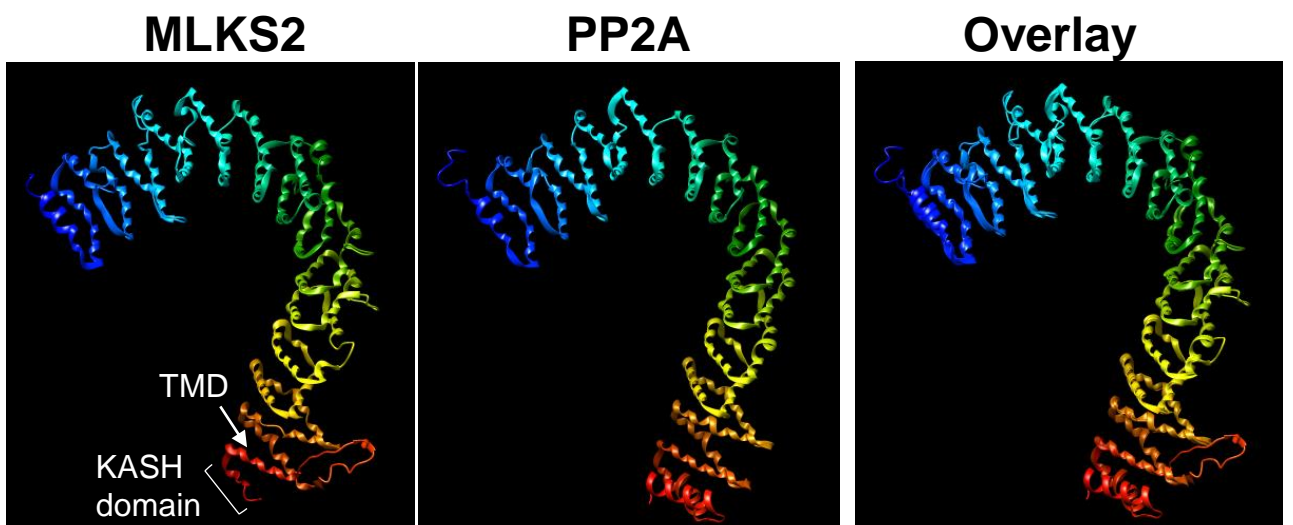**Figure 1**

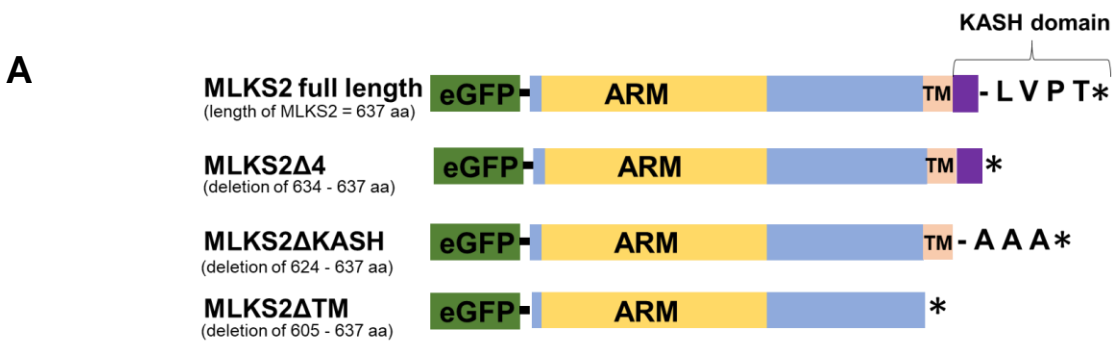

bioRxiv preprint doi: <https://doi.org/10.1101/609594>; this version posted April 29, 2019. The copyright holder for this preprint (which was not certified by peer review) is the author/funder. All rights reserved. No reuse allowed without permission.

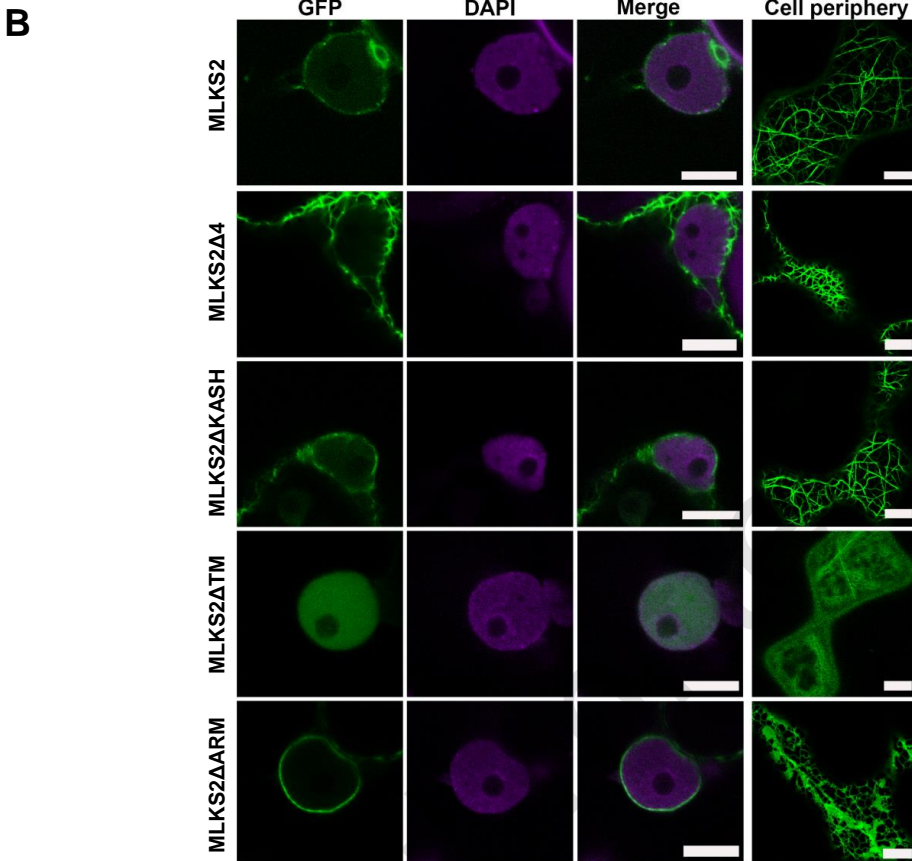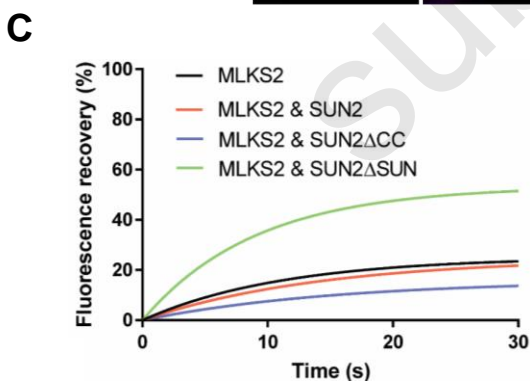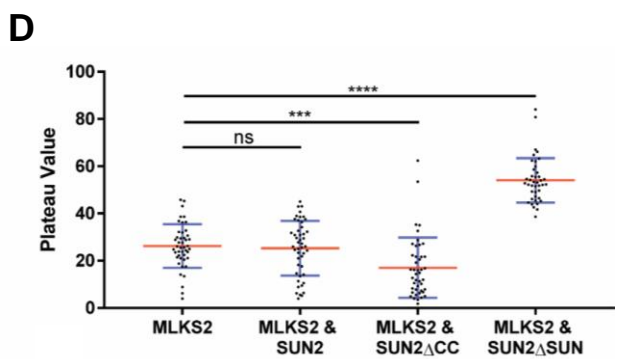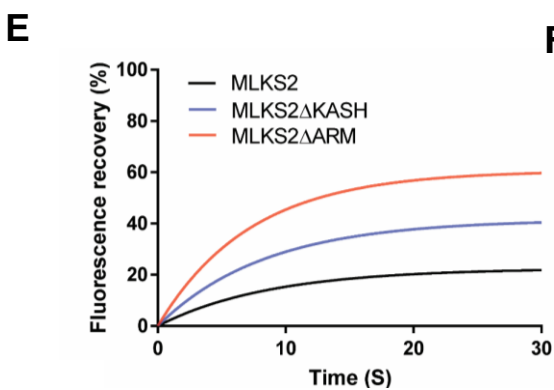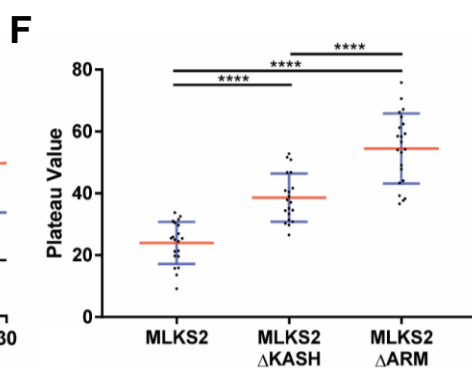

**Figure 2**

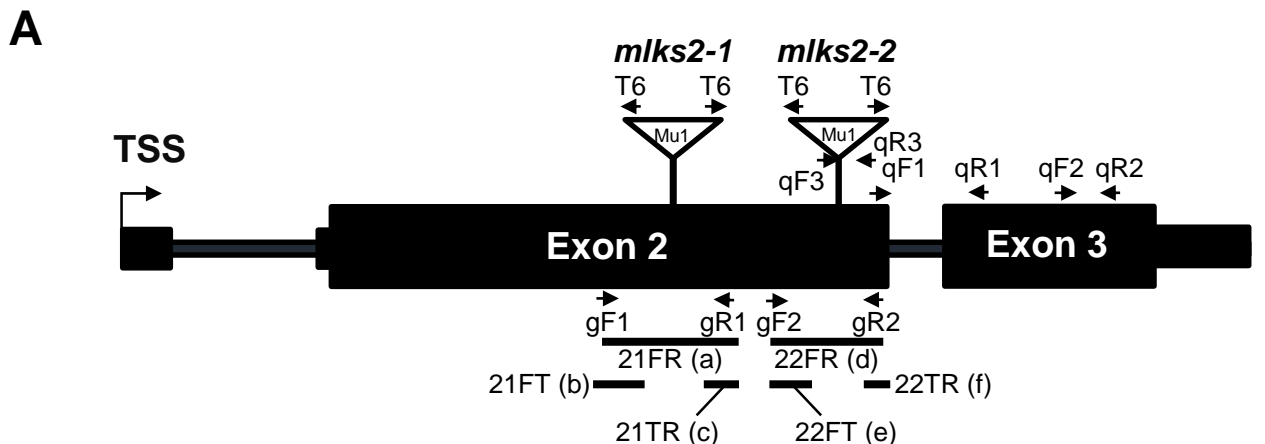

**B**

|                             |                                                    |
|-----------------------------|----------------------------------------------------|
| <i>MLKS2</i> published      | GCCAGAATGACCGCATGCCTTTTCGTCCGAGGTGCTGCGTTTGAGGCATC |
| <i>MLKS2</i> PCR 21FR (a)   | GCCAGAATGACCGCATGCCTTTTCGTCCGAGGTGCTGCGTTTGAGGCATC |
| <i>mlks2-1</i> PCR 21FT (b) | GCCAGAATGACCGCATGCCTTTTCGTCCGAgagataa...           |
| <i>mlks2-1</i> PCR 21TR (c) | ...ttatctcTTTCGTCCGAGGTGCTGCGTTTGAGGCATC           |
|                             |                                                    |
| <i>MLKS2</i> published      | AGCAATTCCTATGAAGATGACTTGGGCGAGGTCTGTGACAGTGAAGTGA  |
| <i>MLKS2</i> PCR 22FR (d)   | AGCAATTCCTATGAAGATGACTTGGGCGAGGTCTGTGACAGTGAAGTGA  |
| <i>mlks2-2</i> PCR 22FT (e) | AGCAATTCCTATGAAGATGACTTGGGCGAgagataatt...          |
| <i>mlks2-2</i> PCR 22TR (f) | ...ttatctcCTTGGGCGAGGTCTGTGACAGTGAAGTGA            |

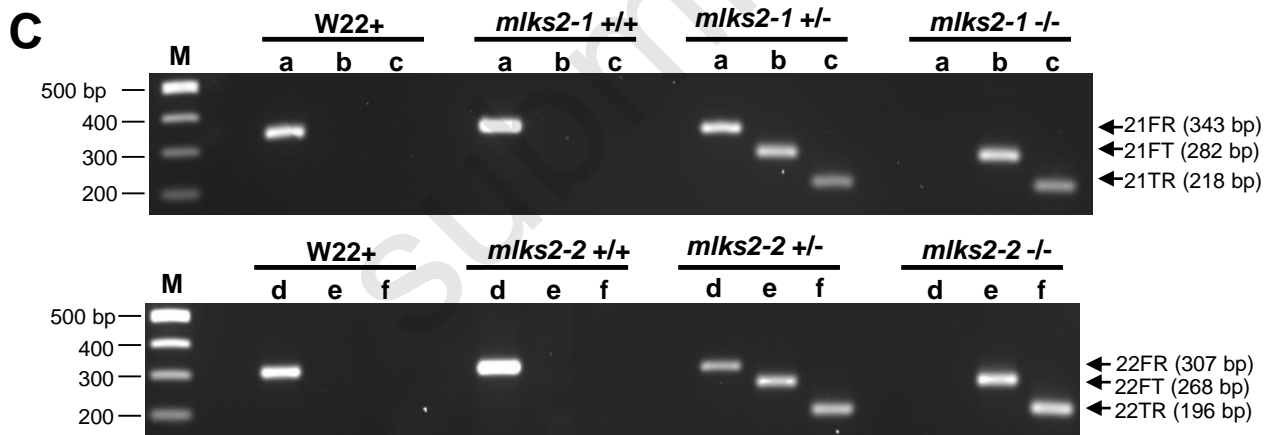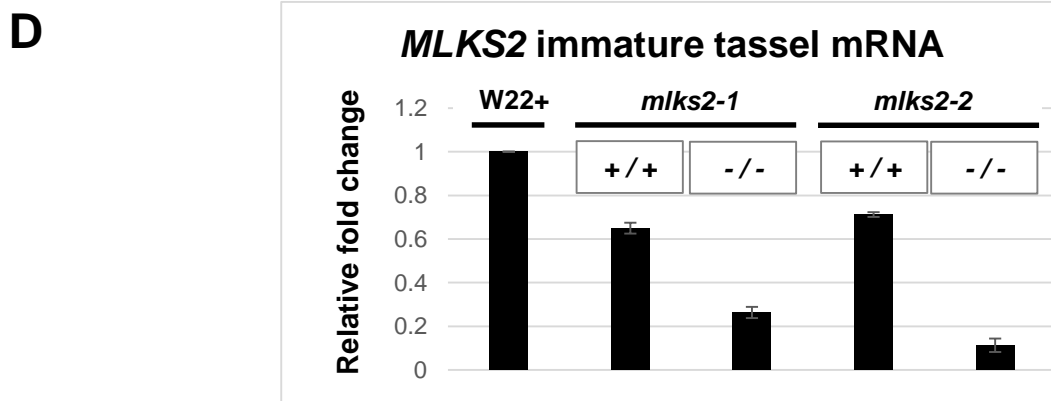

**Figure 3**

Early prophase

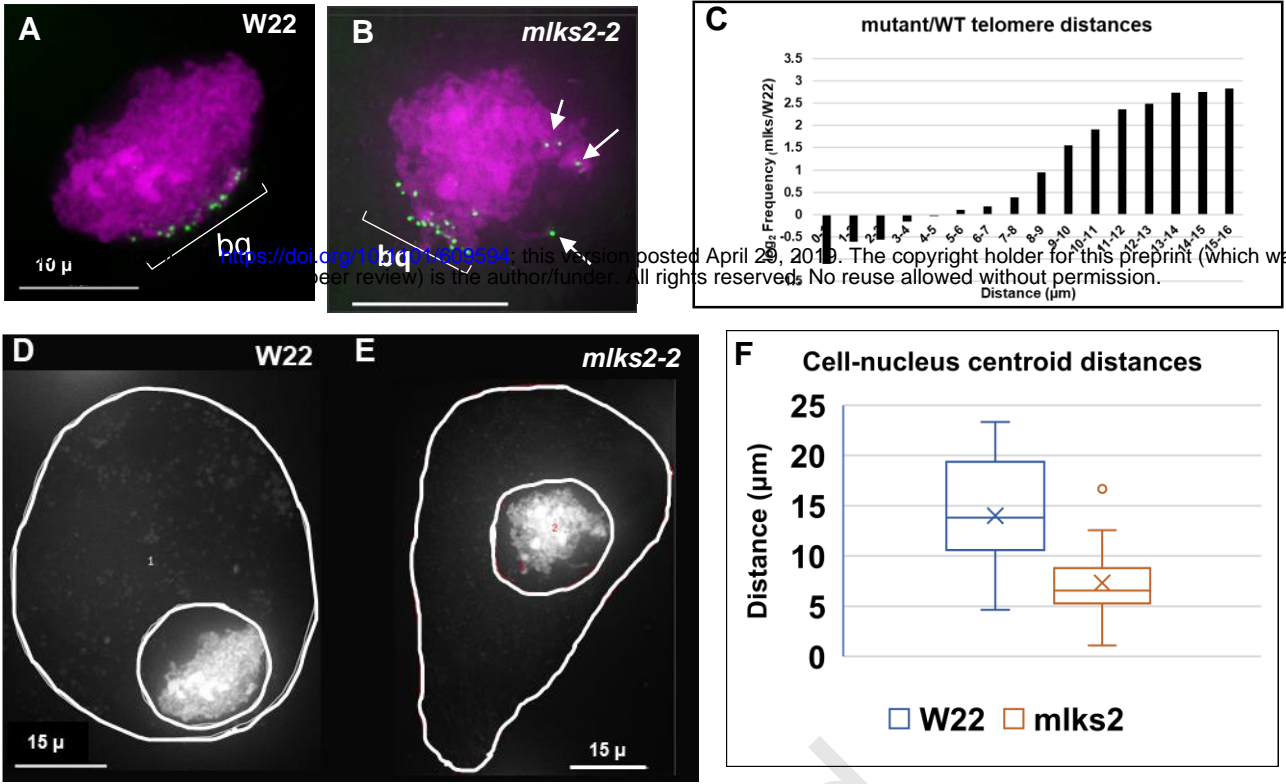

Late prophase

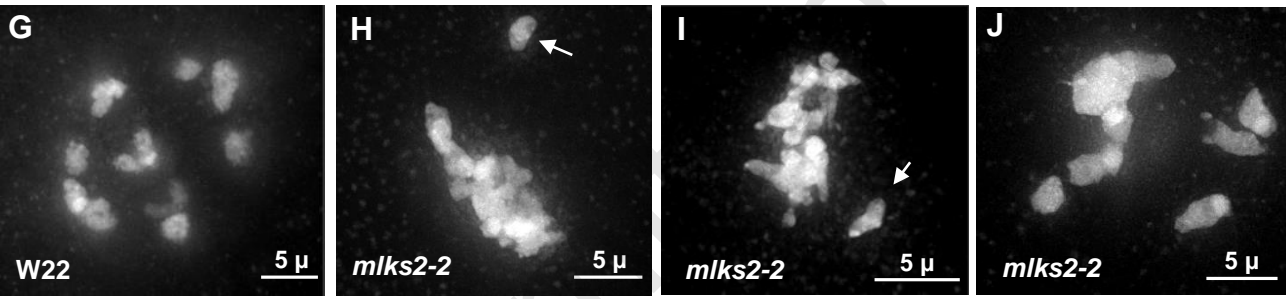

Metaphase

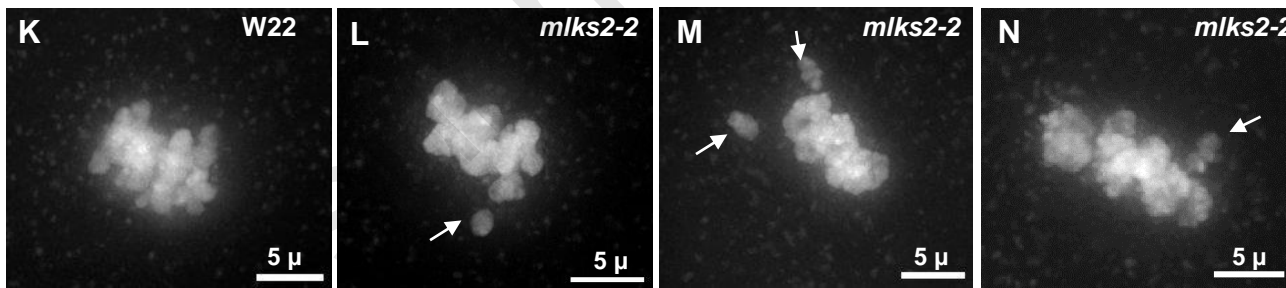

Ana/telo-phase

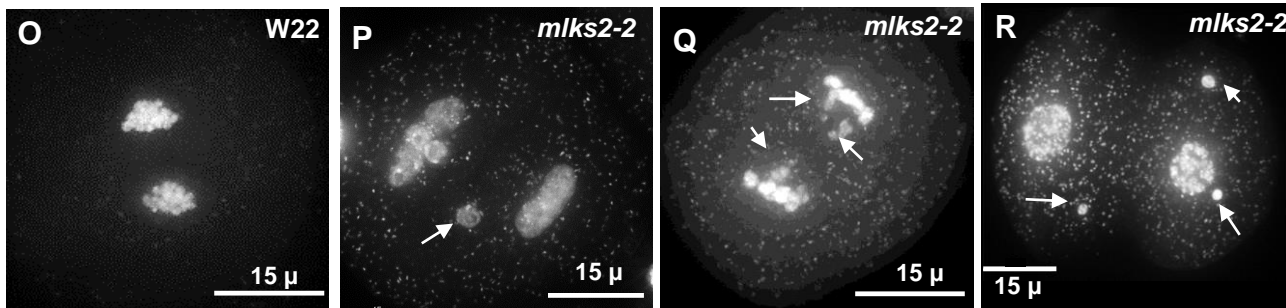

Pollen grains

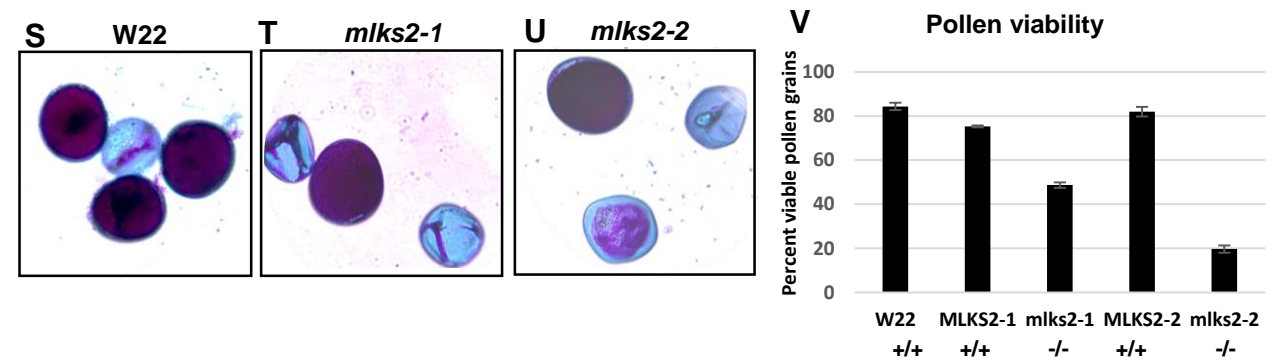

Figure 4



**A**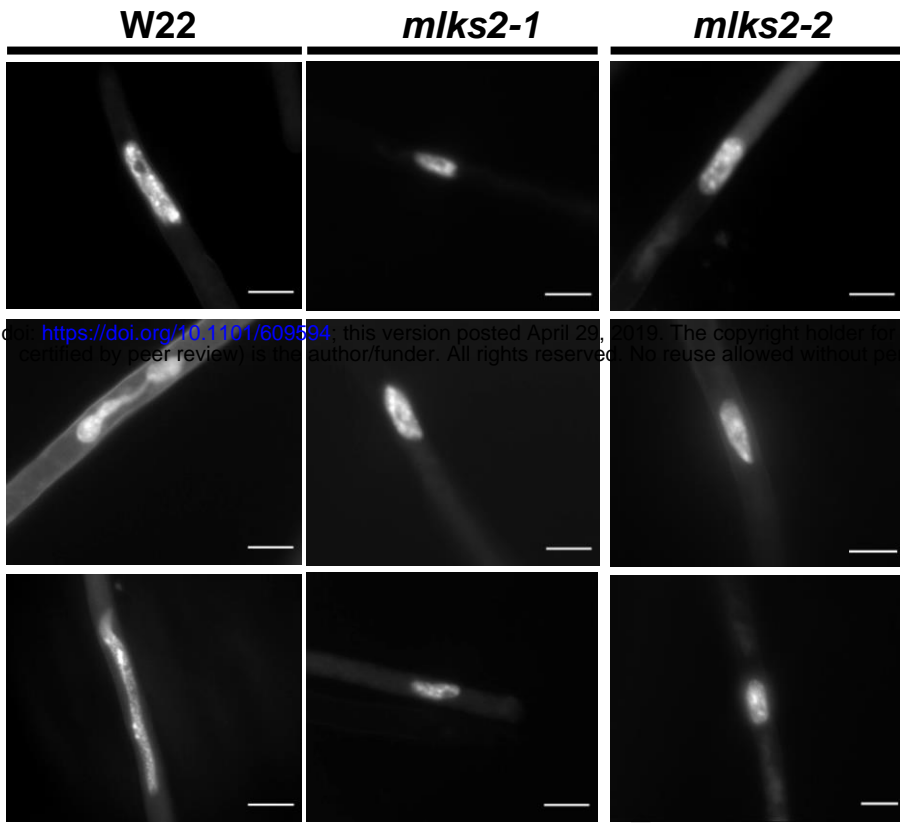

bioRxiv preprint doi: <https://doi.org/10.1101/609594>; this version posted April 26, 2019. The copyright holder for this preprint (which was not certified by peer review) is the author/funder. All rights reserved. No reuse allowed without permission.

**B**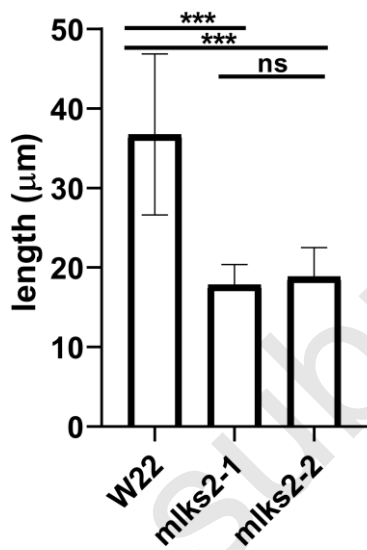**C**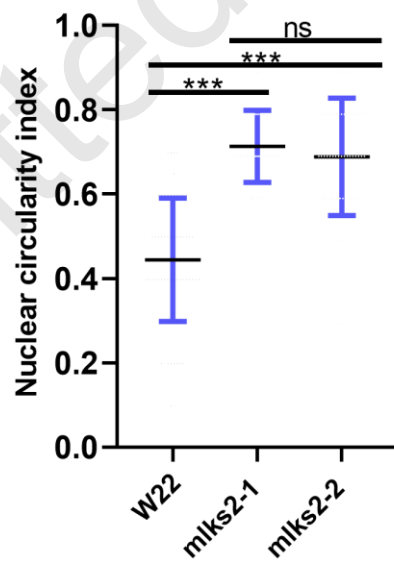**D**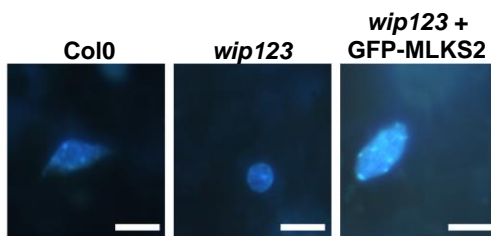**E**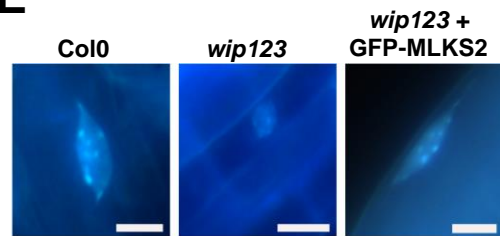**F**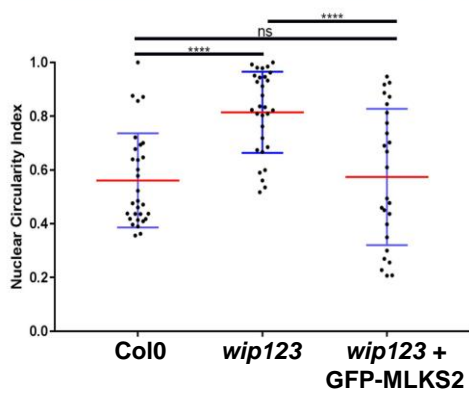**G**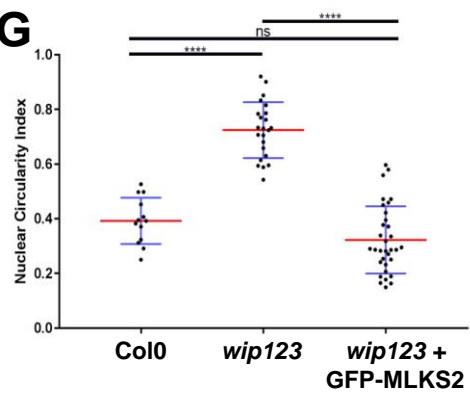**Figure 5**

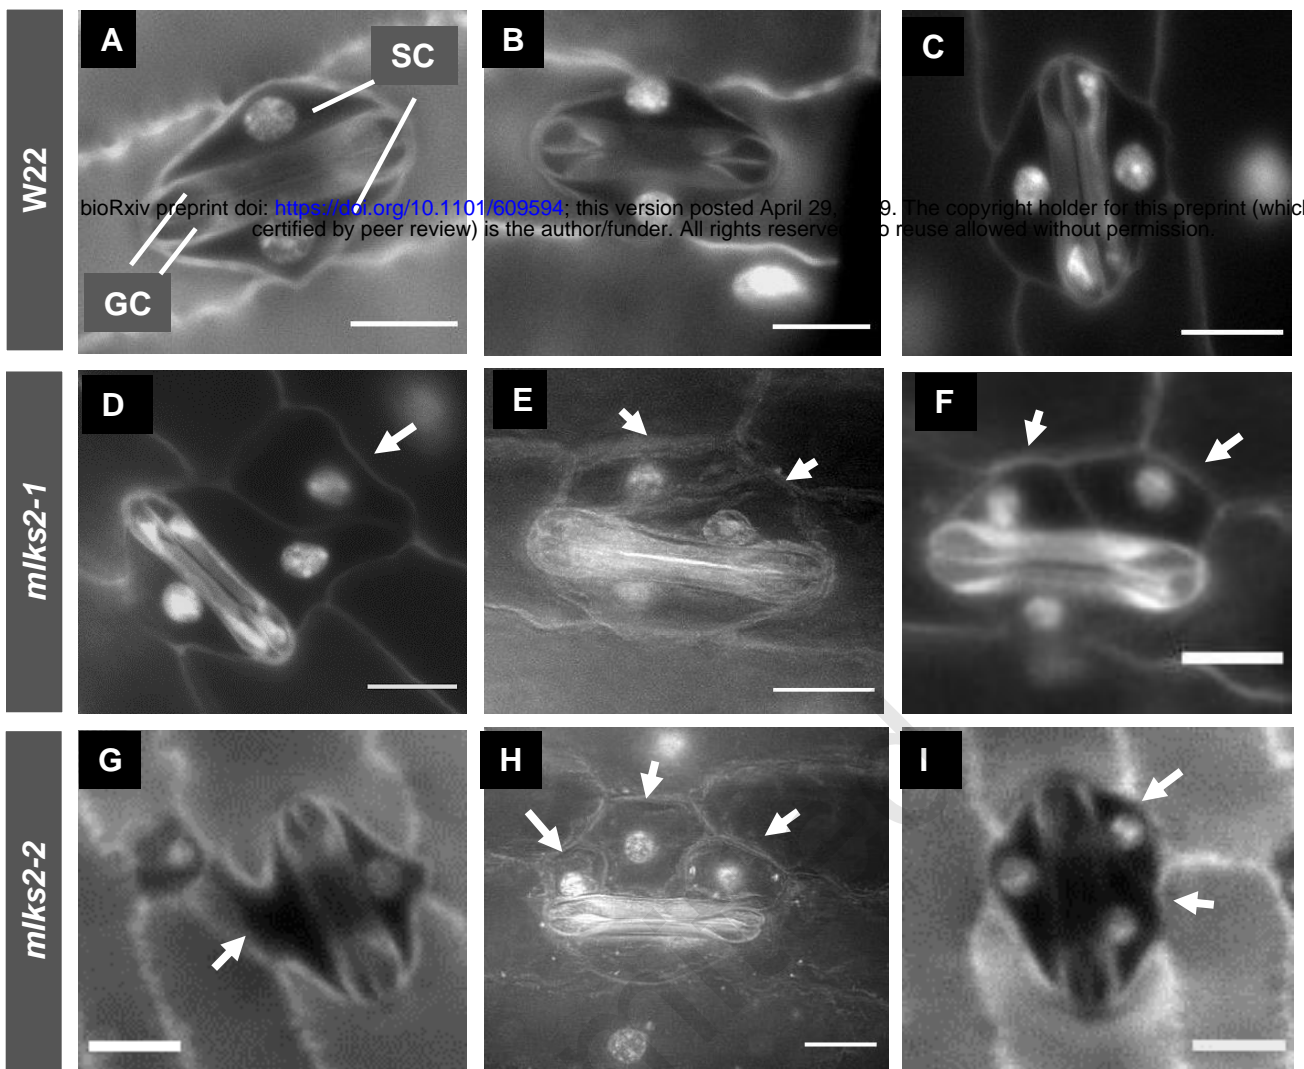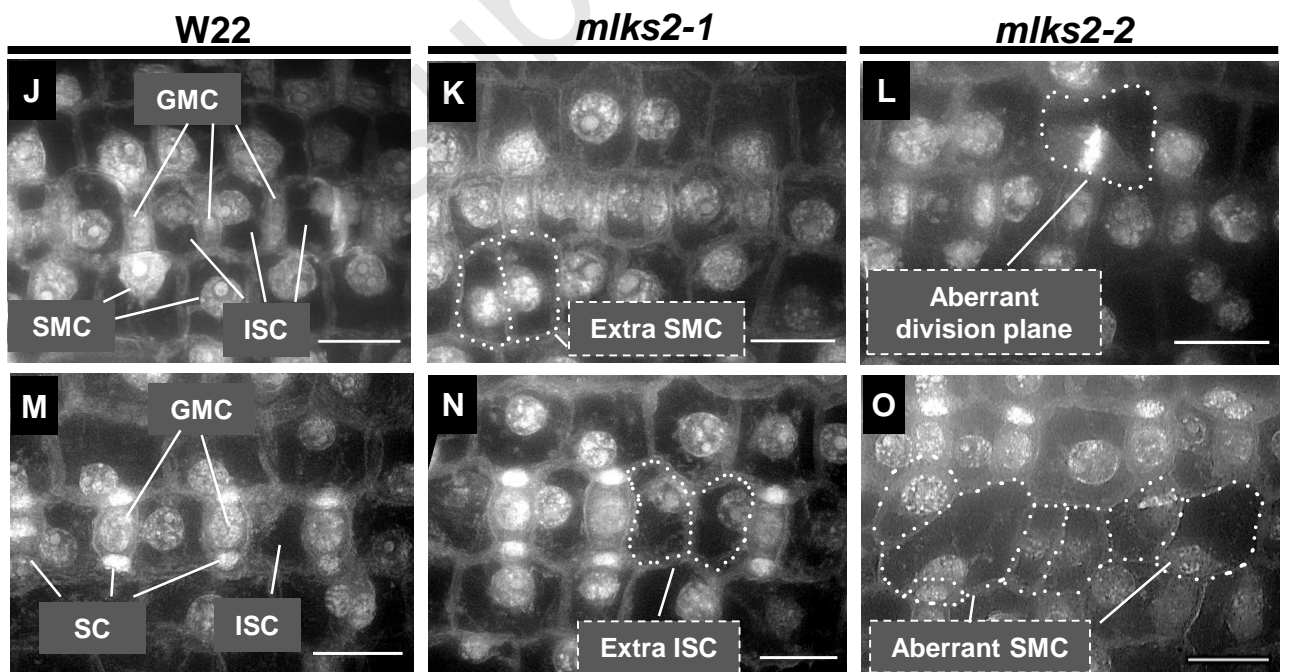

**Figure 6**

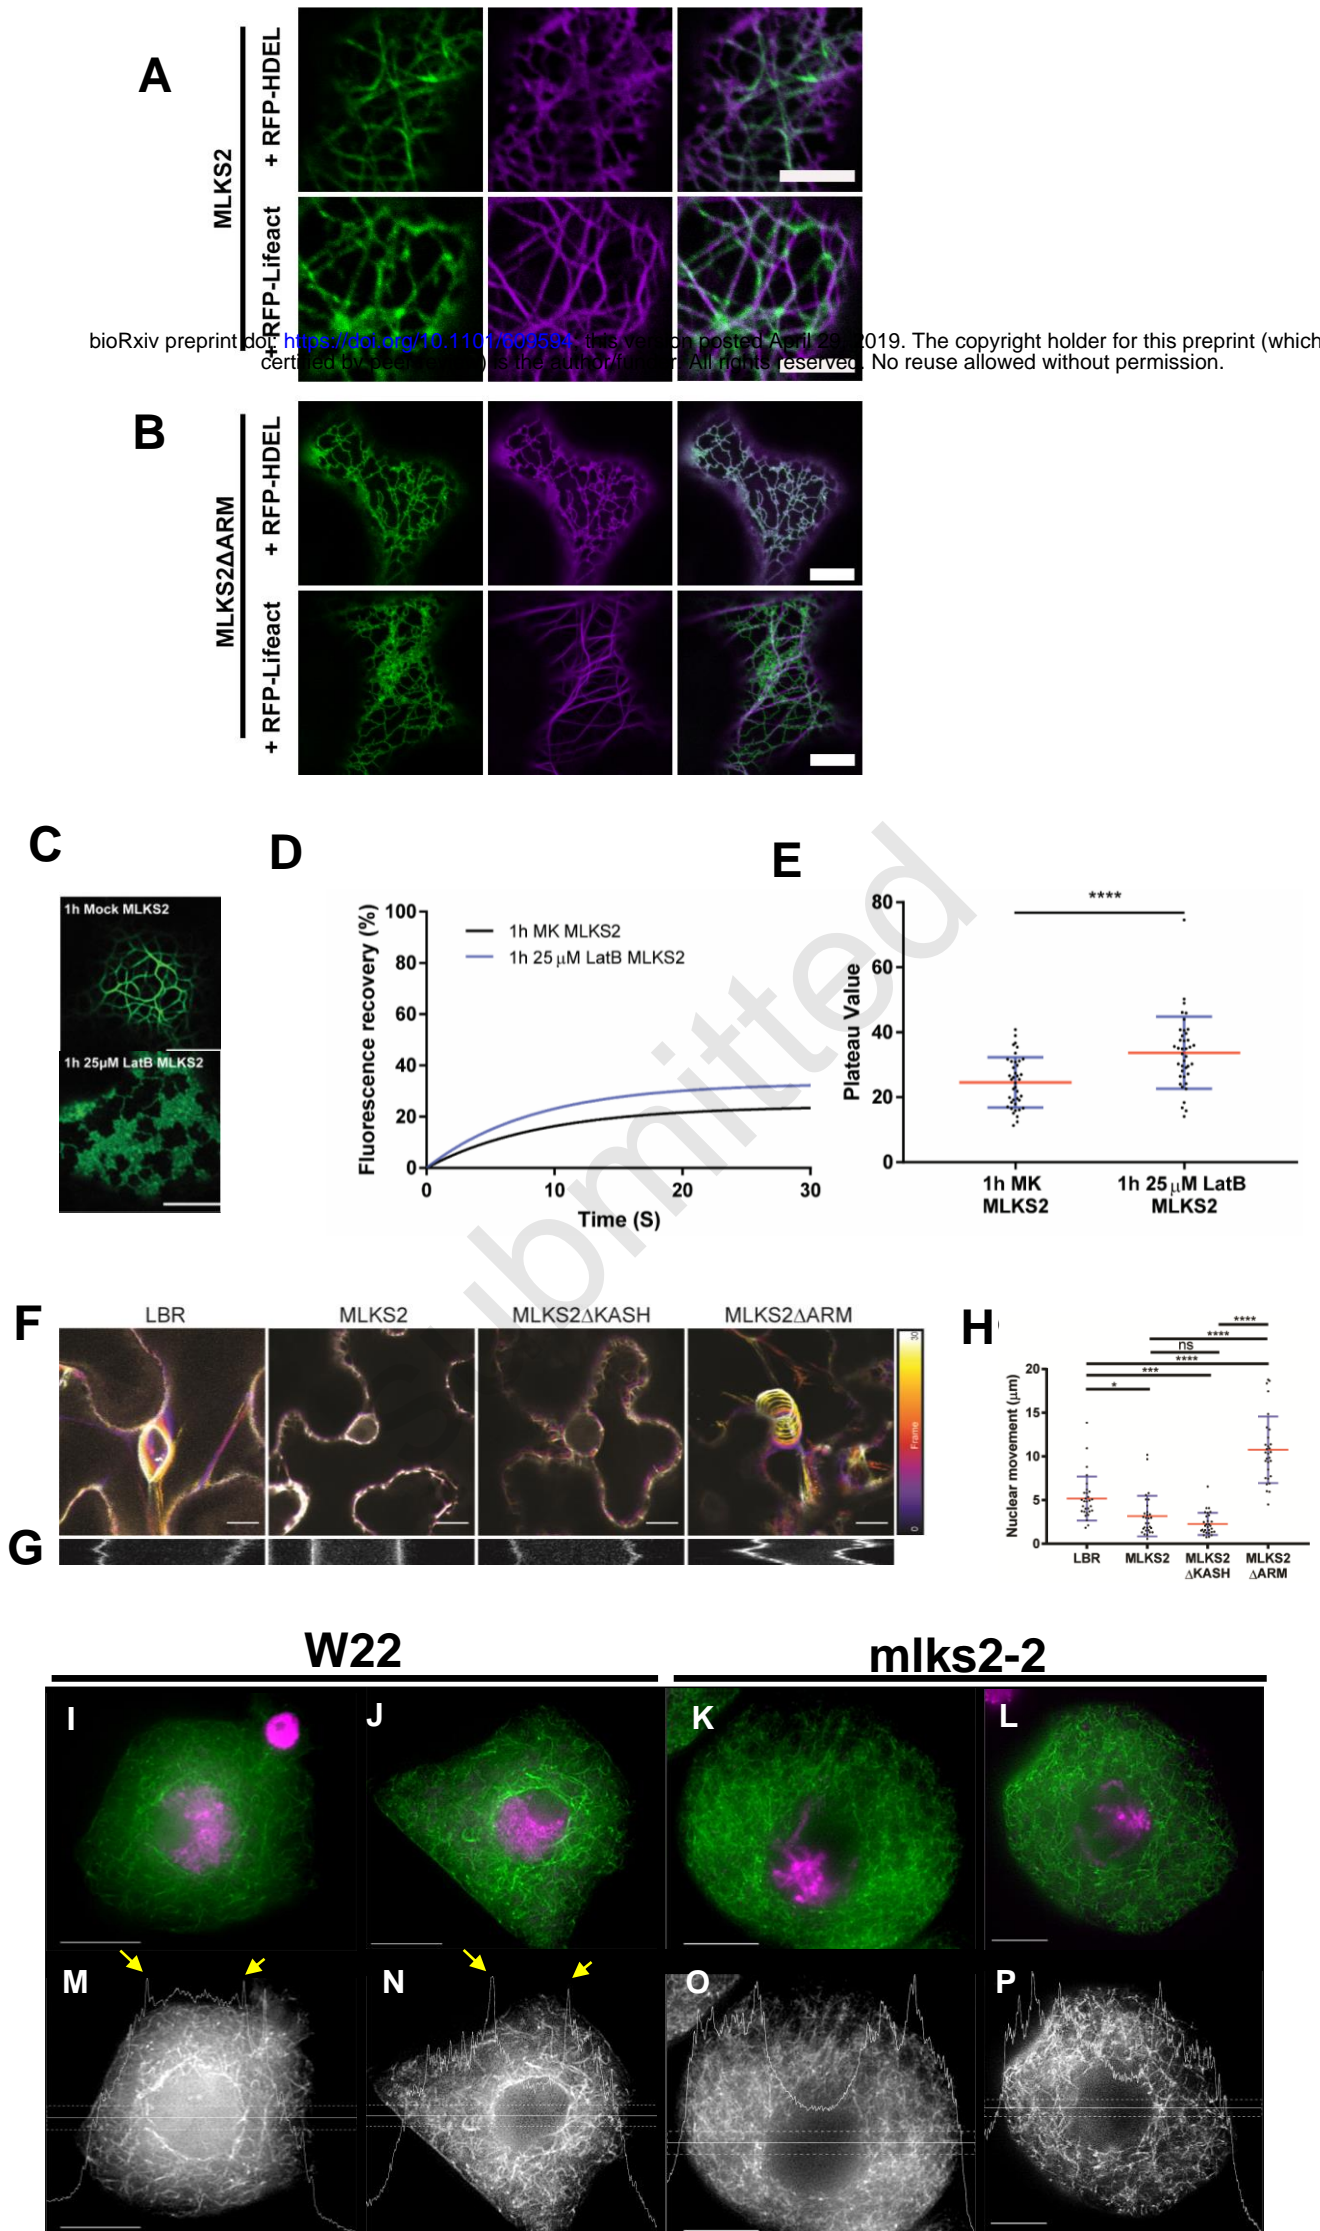

**Figure 7**

## Maize pollen mother cell

**A**

MLKS2 (normal)

**B**

*mlks2-2* (mutant)

F-actin  
MLKS2  
SUN2

NE:  
ONM  
INM

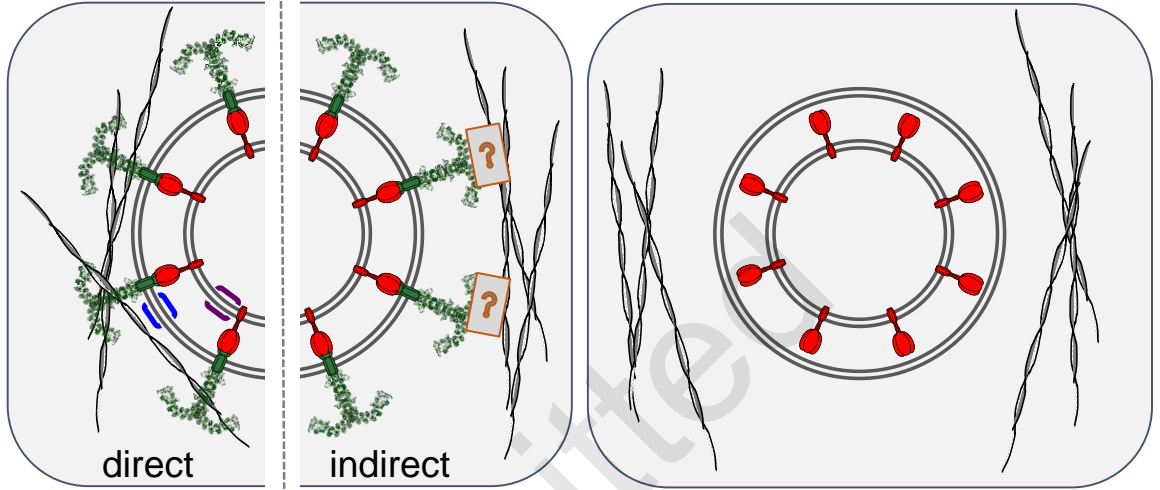

## GFP-ZmKASH in eudicot leaf

**C**

ANCHORED

**D**

MOBILE

MLKS2

MLKS2 $\Delta$ KASH

Control (*lbr*)

MLKS2 $\Delta$ ARM

GFP  
MLKS2  
ZmSUN2  
NbSUN

NE:  
ONM  
INM

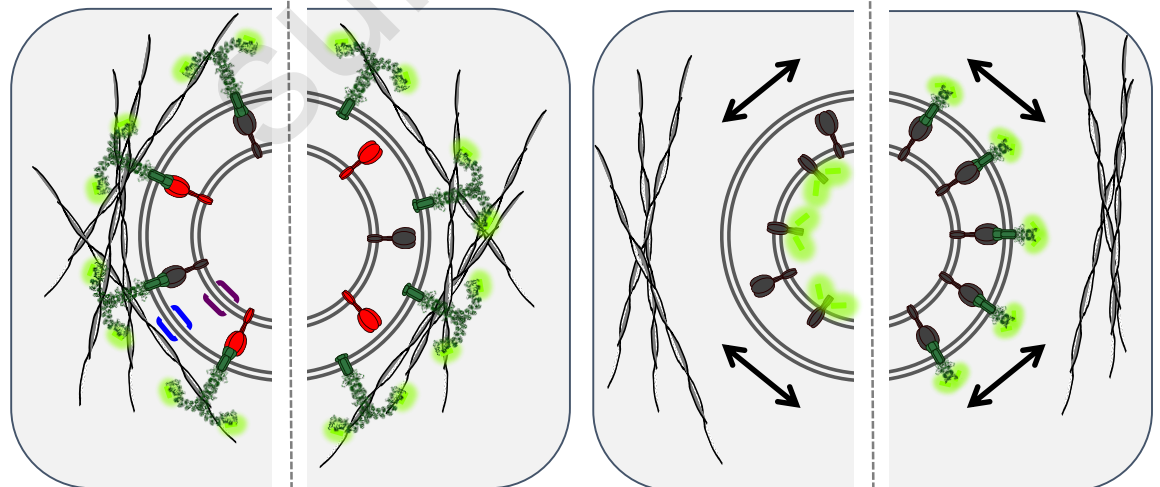

Figure 8

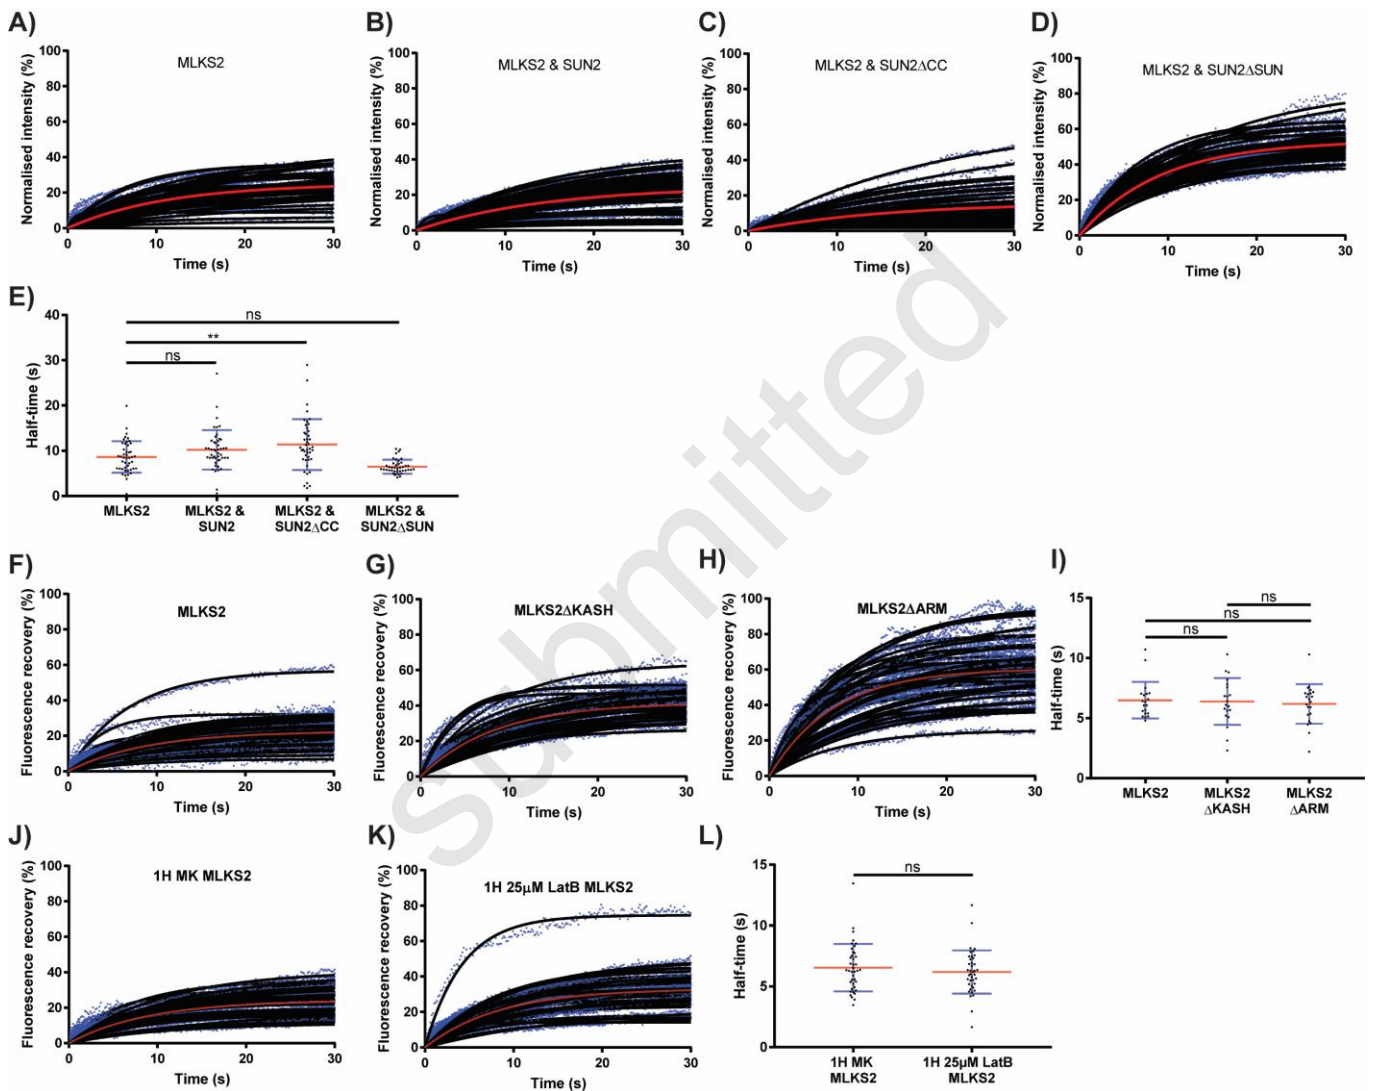

**Figure S1**

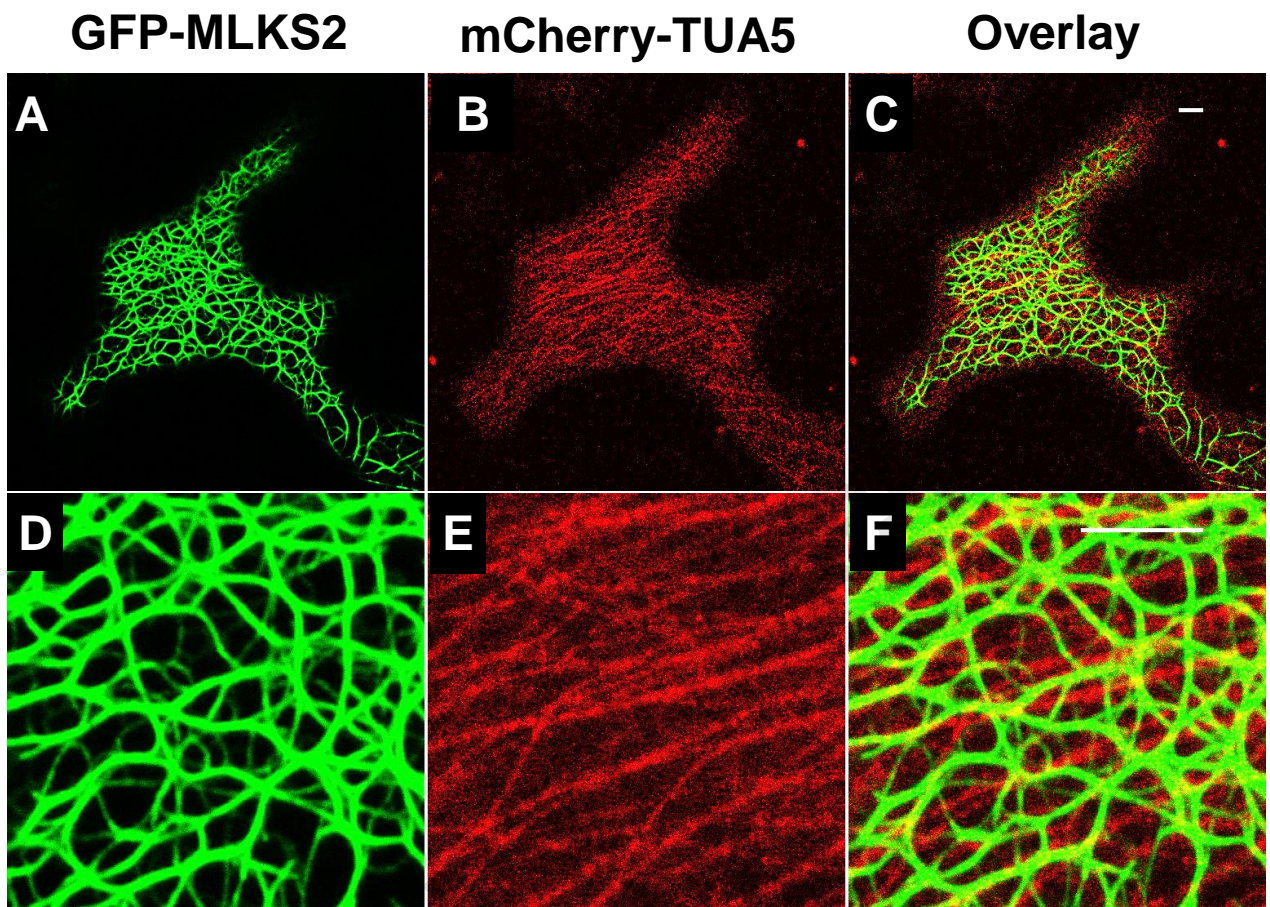

Figure S2

## Table S1. List of genotyping primers (Gumber et al.)

### Primers used for genotyping

| Primer nam | Alternate lab nam | Sequence 5' - 3'          |
|------------|-------------------|---------------------------|
| gF1        | mu1038603F1       | GGAGGCGTACGCGAGGTCCA      |
| gR1        | mu1038603R1       | GAGGCTCCGGCATGGGCTCT      |
| gF2        | mu1056535F2       | ATTCATCCATCATGAACGGCAGCAC |
| gR2        | mu1056535R2       | CTGGGACTGGGAGTCTTGTCCTTG  |

### Primers used for qRT-PCR

|     |       |                       |
|-----|-------|-----------------------|
| qF1 | qS2F1 | AAGGGACAAGACTCCCAGTCC |
| qR1 | qS2R1 | GAGCTTTGAAGCAATCGGAGA |
| qF2 | qS2F2 | CCACTACCGAGGCTGAGAACA |
| qR2 | qS2R2 | TGGTCTTCCCTATGCTGCTTG |
| qF3 | qS2F3 | AAGATGACTTGGGCGAGGTCT |
| qR3 | qS2R3 | GAACCATTGTGGCTTGGTGAC |

**Table S2. List of primers used for construct cloning (Gumber et al.)**

| Plasmid              | Primer Name | Sequence (5'-3')                                    | Purpose                                                                                      |
|----------------------|-------------|-----------------------------------------------------|----------------------------------------------------------------------------------------------|
| MLKS2-EC             | BPHWB8F     | GGGGACAAGTTTGTACAAAAAAGCAGGCTTCATGGTCTCCAAGGGCGAGG  | att primers to amplify eGFP-MLKS2 for creating entry clone "                                 |
|                      | BPHWB8R     | GGGGACCACTTTGTACAAGAAAGCTGGGTCTCAGGTCGGCACCCAGGTACG |                                                                                              |
| MLKS2 $\Delta$ ARM   | 1Fdel4F     | AAGGGCCTCGTCATTTCTTCAGAGCAGATGC                     | To generate MLKS2delARM entry clone                                                          |
|                      | 1Fdel4R     | CCCCATGCCAGCCCCGGC                                  |                                                                                              |
| MLKS2 $\Delta$ 4*    | 1Fdel1F     | TGAGACCCAGCTTTCTTGATC                               | To delete terminal nucleotide bases corresponding to LVPT                                    |
|                      | 1Fdel1R     | GTACGCGCTGTCATCGTC                                  |                                                                                              |
| MLKS2 $\Delta$ KASH* | 1Fdel2F     | CGCATGAGACCCAGCTTTCTTG                              | To delete terminal 42 bases corresponding to TMD and add 9 bases corresponding to 3 alanines |
|                      | 1Fdel2R     | GCAGCGATCAGCATCGTAATGATAG                           |                                                                                              |
| MLKS2 $\Delta$ TM*   | 1Fdel3F     | TGAGACCCAGCTTTCTTGACAAAG                            | To delete bases TMD onwards                                                                  |
|                      | 1Fdel3R     | CTTCGCGGGTACTTCCG                                   |                                                                                              |

Submitted



**Table S3. Plasmid information** (Gumber et al.)

|                                      | <b>Plasmid name</b>                | <b>Alternate lab name</b> | <b>Construct</b>              | <b>Vector backbone</b> | <b>Antibiotic marker</b> | <b>Deletion</b>                |
|--------------------------------------|------------------------------------|---------------------------|-------------------------------|------------------------|--------------------------|--------------------------------|
| Synthetic construct                  | Genscript                          | pHWBF08                   | eGFP-FLAG-HA-MLKS2            | pUC18                  | Amp                      | none                           |
|                                      | Full length MLKS2 entry clone      | MLKS2ec                   | eGFP-FLAG-HA-MLKS2            | pDONR221               | Kan                      | none                           |
|                                      | Full length MLKS2 expression clone | MLKS2exp                  | pPK1F-EC                      | eGFP-FLAG-HA-MLKS2     | pH7WG2                   | Sm/Sp                          |
| MLKS2del4ec                          |                                    | pPK1Fexp                  | eGFP-FLAG-HA-MLKS2del4        | pDONR221               | Kan                      | terminal 4 amino acid residues |
| Deletion construct entry clones      | MLKS2delKASHec                     | pPK1FdelKASHec            | eGFP-FLAG-HA-MLKS2delKASH-AAA | pDONR221               | Kan                      | KASH domain                    |
|                                      | MLKS2delTMec                       | pMLKS2delTMec             | eGFP-FLAG-HA-MLKS2delTM       | pDONR221               | Kan                      | transmembrane domain onwards   |
|                                      | MLKS2delARMec                      | pMLKS2delARMec            | eGFP-FLAG-HA-MLKS2delARM      | pDONR221               | Kan                      | ARM domain                     |
|                                      | MLKS2del4exp                       | pPK1Fdel4exp              | eGFP-FLAG-HA-MLKS2del4        | pH7WG2                 | Sm/Sp                    | terminal 4 amino acid residues |
| Deletion construct expression clones | MLKS2delKASHexp                    | pPK1FdelKASH-AAAexp       | eGFP-FLAG-HA-MLKS2delKASH-AAA | pH7WG2                 | Sm/Sp                    | KASH domain                    |
|                                      | MLKS2delTMexp                      | pPK1FdelTMexp             | eGFP-FLAG-HA-MLKS2delTM       | pH7WG2                 | Sm/Sp                    | transmembrane domain           |
|                                      | MLKS2delARMexp                     | pPK1FdelARMexp            | eGFP-FLAG-HA-MLKS2delARM      | pH7WG2                 | Sm/Sp                    | ARM domain                     |

Submitted
